# Supplementary material for: Effects of SlowMo, a Blended Digital Therapy Targeting Reasoning, on Paranoia Among People With Psychosis: A Randomized Clinical Trial
Source: PubMed Central journal article supplement (PMC8027943; doi:10.1001/jamapsychiatry.2021.0326), 2021-04-07
Supplement: jamapsychiatry-e210326-s001.pdf [file jamapsychiatry-e210326-s001.pdf]

1 SlowMo Trial Protocol and Statistical Analysis Plan (SAP)

2

3 **1. SlowMo Trial Protocol**

4 **The following protocol (v1.0; 26/09/2016) predates the start of recruitment on the trial (01/05/2017). The trial**  
5 **protocol was also published in a peer reviewed journal:**

6 **Garety PA, Ward T, Freeman D, et al. SlowMo, a digital therapy targeting reasoning in paranoia, versus**  
7 **treatment as usual in the treatment of people who fear harm from others: study protocol for a randomised**  
8 **controlled trial. *Trials*. 2017;18(1):510.**

9 **Before and during the trial the only changes to this v1.0 protocol are as follows (resulting in a final Protocol**  
10 **Version 1.2):**

| <b>Document ID - (Document Title) revision X.Y</b> | <b>Description of changes from previous revision</b>                                                                                                                                    | <b>Effective Date</b> |
|----------------------------------------------------|-----------------------------------------------------------------------------------------------------------------------------------------------------------------------------------------|-----------------------|
| Version 1.1 ; 13/03/2017<br>Amended on 25/09/2018  | Updated to reflect six-month trial extension                                                                                                                                            | 25/09/2018            |
| Version 1.0; 26/09/2016-<br>Amended on 13/3/2017   | Inclusion criteria added (18 years old and use of SCAN).<br>Further detail on screening and stratification by paranoia severity. Time-points specified on Table 1 (previously missing.) | 13/3/2017             |

11

12

13 **1. PROTOCOL FULL TITLE: The SlowMo Trial: A randomised controlled trial of a digital therapy for**  
14 **people who fear harm from others**

**Protocol Short Title/ Acronym:**

SlowMo trial: a digital therapy for people who fear harm from others.

15

16 Trial Identifiers

|                                 |                                          |              |            |
|---------------------------------|------------------------------------------|--------------|------------|
| <b>ISRCTN:</b>                  | 32448671                                 |              |            |
| <b>REC Number:</b>              | REC Reference: 16/LO/1862; IRAS: 206680. |              |            |
| <b>UKCRN Number:</b>            | <b>CPMS ID: 32154</b>                    |              |            |
| <b>Protocol Version Number:</b> | 1.0                                      | <b>Date:</b> | 26/09/2016 |

17

18 (Co) Sponsor(s)

19

|                   |                                                                                             |
|-------------------|---------------------------------------------------------------------------------------------|
| <b>Name:</b>      | Keith Brennan- Director of Research Management, Director of Administration (Health Schools) |
| <b>Address:</b>   | Room 1.8 Hodgkin Building, Guy's Campus, King's College London, London SE1 4UL              |
| <b>Telephone:</b> | 020 7848 6960                                                                               |
| <b>Fax:</b>       |                                                                                             |
| <b>Email:</b>     | keith.brennan@kcl.ac.uk                                                                     |

20

|                   |                                                                                                                            |
|-------------------|----------------------------------------------------------------------------------------------------------------------------|
| <b>Name:</b>      | South London and Maudsley NHS Foundation Trust (Jennifer Liebscher)                                                        |
| <b>Address:</b>   | R&D Department, Room W1.11, Institute of Psychiatry, Psychology & Neuroscience (IoPPN), De Crespigny Park, London, SE5 8AF |
| <b>Telephone:</b> | 020 7848 0251                                                                                                              |
| <b>Fax:</b>       |                                                                                                                            |
| <b>Email:</b>     | jennifer.liebscher@kcl.ac.uk                                                                                               |

21

22 Chief Investigator

|                   |                                            |
|-------------------|--------------------------------------------|
| <b>Name:</b>      | Professor Philippa Garety                  |
| <b>Address:</b>   | PO Box 77 Henry Wellcome Building, SE5 8AF |
| <b>Telephone:</b> | +44 (0)20 7848 5046/ +44(0)7837 005412     |
| <b>Fax:</b>       | +44 (0)20 7848 5006                        |
| <b>Email:</b>     | philippa.garety@kcl.ac.uk                  |

23  
24  
25  
26

**Name and address of Co-Investigator(s), Statistician, Therapy Service, Laboratories etc**

|                        |                                                                                           |
|------------------------|-------------------------------------------------------------------------------------------|
| <b>Name:</b>           | Professor Paul Bebbington                                                                 |
| <b>Position/ Role:</b> | Emeritus Professor of Social and Community Psychiatry (Member of Research Team)           |
| <b>Address:</b>        | UCL Mental Health Sciences Unit, 2nd Floor, Charles Bell House, 67-73 Riding House Street |
| <b>Telephone:</b>      | 02076799465                                                                               |
| <b>Fax:</b>            |                                                                                           |
| <b>Email:</b>          | <a href="mailto:P.Bebbington@ucl.ac.uk">P.Bebbington@ucl.ac.uk</a>                        |

27

|                        |                                                                                                                            |
|------------------------|----------------------------------------------------------------------------------------------------------------------------|
| <b>Name:</b>           | Professor Graham Dunn                                                                                                      |
| <b>Position/ Role:</b> | Professor of medical statistics (Trial Statistician)                                                                       |
| <b>Address:</b>        | University of Manchester, Centre for Biostatistics, Jean McFarlane Building (First Floor), Oxford Road, Manchester, M139PL |
| <b>Telephone:</b>      | 0161 275 5422                                                                                                              |
| <b>Fax:</b>            |                                                                                                                            |
| <b>Email:</b>          | <a href="mailto:Graham.dunn@manchester.ac.uk">Graham.dunn@manchester.ac.uk</a>                                             |

28

|                        |                                                                                                                            |
|------------------------|----------------------------------------------------------------------------------------------------------------------------|
| <b>Name:</b>           | Professor Richard Emsley                                                                                                   |
| <b>Position/ Role:</b> | Professor of medical statistics (Trial Statistician)                                                                       |
| <b>Address:</b>        | University of Manchester, Centre for Biostatistics, Jean McFarlane Building (First Floor), Oxford Road, Manchester, M139PL |
| <b>Telephone:</b>      | 0161 275 5422                                                                                                              |
| <b>Fax:</b>            |                                                                                                                            |
| <b>Email:</b>          | <a href="mailto:richard.emsley@manchester.ac.uk">richard.emsley@manchester.ac.uk</a>                                       |

29  
30  
31

|                        |                                                                                                      |
|------------------------|------------------------------------------------------------------------------------------------------|
| <b>Name:</b>           | Professor David Fowler                                                                               |
| <b>Position/ Role:</b> | Professor of Clinical Psychology (Member of Research Team)                                           |
| <b>Address:</b>        | University of Sussex, School of Psychology, Pevensey Building, University of Sussex, Falmer, BN1 9QH |

|                   |                                                                  |
|-------------------|------------------------------------------------------------------|
| <b>Telephone:</b> | 01273 872721                                                     |
| <b>Fax:</b>       |                                                                  |
| <b>Email:</b>     | <a href="mailto:d.fowler@sussex.ac.uk">d.fowler@sussex.ac.uk</a> |

32

|                        |                                                                                     |
|------------------------|-------------------------------------------------------------------------------------|
| <b>Name:</b>           | Professor Daniel Freeman                                                            |
| <b>Position/ Role:</b> | Professor of Clinical Psychology (Member of Research Team)                          |
| <b>Address:</b>        | University of Oxford, Department of Psychiatry, Warneford Hospital, Oxford, OX3 7JX |
| <b>Telephone:</b>      | 01865226490                                                                         |
| <b>Fax:</b>            |                                                                                     |
| <b>Email:</b>          | <a href="mailto:daniel.freeman@psych.ox.ac.uk">daniel.freeman@psych.ox.ac.uk</a>    |

33

|                        |                                                                                                                                                                |
|------------------------|----------------------------------------------------------------------------------------------------------------------------------------------------------------|
| <b>Name:</b>           | Dr Kathryn Greenwood                                                                                                                                           |
| <b>Position/ Role:</b> | Senior Research Fellow (Sussex University) and Consultant Clinical Psychologist (Sussex Partnership Trust, Research and Development) (Member of Research Team) |
| <b>Address:</b>        | University of Sussex, School of Psychology, Pevensey Building, University of Sussex, Falmer, BN1 9QH                                                           |
| <b>Telephone:</b>      | 01273 872721                                                                                                                                                   |
| <b>Fax:</b>            |                                                                                                                                                                |
| <b>Email:</b>          | <a href="mailto:k.e.greenwood@sussex.ac.uk">k.e.greenwood@sussex.ac.uk</a>                                                                                     |

34

|                        |                                                                    |
|------------------------|--------------------------------------------------------------------|
| <b>Name:</b>           | Dr Helen Harding (nee Waller)                                      |
| <b>Position/ Role:</b> | Research Clinical Psychologist (Member of Research Team)           |
| <b>Address:</b>        | South London and Maudsley Foundation NHS trust.                    |
| <b>Telephone:</b>      |                                                                    |
| <b>Fax:</b>            |                                                                    |
| <b>Email:</b>          | <a href="mailto:helen.waller@kcl.ac.uk">helen.waller@kcl.ac.uk</a> |

35

|                        |                                                                        |
|------------------------|------------------------------------------------------------------------|
| <b>Name:</b>           | Dr Amy Hardy                                                           |
| <b>Position/ Role:</b> | Research Clinical Psychologist (Member of Research Team); Digital Lead |
| <b>Address:</b>        | PO Box 77 Henry Wellcome Building, SE5 8AF                             |
| <b>Telephone:</b>      | 02078485178                                                            |

|               |                     |
|---------------|---------------------|
| <b>Fax:</b>   |                     |
| <b>Email:</b> | Amy.hardy@kcl.ac.uk |

36

|                        |                                                            |
|------------------------|------------------------------------------------------------|
| <b>Name:</b>           | Professor Elizabeth Kuipers                                |
| <b>Position/ Role:</b> | Professor of Clinical Psychology (Member of Research Team) |
| <b>Address:</b>        | PO Box 77 Henry Wellcome Building, SE5 8AF                 |
| <b>Telephone:</b>      | 02078480232                                                |
| <b>Fax:</b>            |                                                            |
| <b>Email:</b>          | elizabeth.kuipers@kcl.ac.uk                                |

37

|                        |                                                                              |
|------------------------|------------------------------------------------------------------------------|
| <b>Name:</b>           | Dr Tom Ward                                                                  |
| <b>Position/ Role:</b> | Research Clinical Psychologist (Member of Research Team); Trial Co-ordinator |
| <b>Address:</b>        | PO Box 77 Henry Wellcome Building, SE5 8AF                                   |
| <b>Telephone:</b>      | 02078480594                                                                  |
| <b>Fax:</b>            |                                                                              |
| <b>Email:</b>          | Thomas.ward@kcl.ac.uk                                                        |

38

39

40 **2. Study Synopsis**

|                                                          |                                                                                                            |
|----------------------------------------------------------|------------------------------------------------------------------------------------------------------------|
| <b>TITLE OF CLINICAL TRIAL:</b>                          | THE SLOWMO TRIAL: A RANDOMISED CONTROLLED TRIAL OF A DIGITAL THERAPY FOR PEOPLE WHO FEAR HARM FROM OTHERS. |
| <b>Protocol Short Title/ Acronym:</b>                    | SlowMo trial: a digital therapy for people who fear harm from others.                                      |
| <b>Study Phase If Not Mentioned In Title:</b>            | This is a late phase II/early phase III trial.                                                             |
| <b>Sponsor Name:</b>                                     | Kings College London (Co-Sponsor: South London and Maudsley NHS Foundation Trust)                          |
| <b>Chief Investigator:</b>                               | Professor Philippa Garety                                                                                  |
| <b>UKCRN Number:</b>                                     | <b>CPMS ID: 32154</b>                                                                                      |
| <b>REC Number:</b>                                       | REC Reference: 16/LO/1862; IRAS: 206680.                                                                   |
| <b>Medical Condition Or Disease Under Investigation:</b> | Psychosis (specifically paranoia/ fears about harm from others)                                            |

|                                                                   |                                                                                                                                                                                                                                                                                                                                                                                                                                                                                                                                                                                                                                                                                                                                                                                                                                                                                                                                                         |
|-------------------------------------------------------------------|---------------------------------------------------------------------------------------------------------------------------------------------------------------------------------------------------------------------------------------------------------------------------------------------------------------------------------------------------------------------------------------------------------------------------------------------------------------------------------------------------------------------------------------------------------------------------------------------------------------------------------------------------------------------------------------------------------------------------------------------------------------------------------------------------------------------------------------------------------------------------------------------------------------------------------------------------------|
| <b>Purpose Of Clinical Trial:</b>                                 | We aim to test the clinical efficacy of SlowMo, our new therapy, and determine the mechanism through which it reduces paranoia severity, over 24 weeks, and to identify participant characteristics that moderate its effectiveness (either by moderating the degree of change in the mechanism, or by influencing adherence to the intervention).                                                                                                                                                                                                                                                                                                                                                                                                                                                                                                                                                                                                      |
| <b>Primary Objective:</b>                                         | <p>The main research questions are as follows:</p> <ol style="list-style-type: none"> <li>1. Is SlowMo efficacious in reducing paranoia severity over 24 weeks, when added to treatment as usual (TAU), in comparison to TAU alone?</li> <li>2. Does SlowMo reduce paranoia severity by improving fast thinking (reducing belief inflexibility and jumping to conclusions)?</li> <li>3. Do participant characteristics (i.e. their cognitive capacities, specifically working memory and thinking habits; and their symptoms, specifically negative symptoms) moderate the effects of the intervention?</li> <li>4. Does outcome differ by adherence to the intervention and is adherence predicted by the participants' beliefs about their illness and about the intervention?</li> <li>5. Does the SlowMo digital therapy platform have acceptable rates of usability, acceptability and adherence?</li> <li>6. Does SlowMo reduce worry?</li> </ol> |
| <b>Secondary Objective(s):</b>                                    | N/A                                                                                                                                                                                                                                                                                                                                                                                                                                                                                                                                                                                                                                                                                                                                                                                                                                                                                                                                                     |
| <b>Trial Design:</b>                                              | A parallel-group randomised controlled trial, with 1:1 allocation and blinded assessors, to test the efficacy of the SlowMo intervention in reducing paranoia severity when added to standardised Treatment As Usual (TAU).                                                                                                                                                                                                                                                                                                                                                                                                                                                                                                                                                                                                                                                                                                                             |
| <b>Endpoints:</b>                                                 | Assessments will be made at baseline, after treatment at 12 weeks, and at 24-week follow-up. Trial aims to commence in January 2017 and will proceed for a total of 31 months.                                                                                                                                                                                                                                                                                                                                                                                                                                                                                                                                                                                                                                                                                                                                                                          |
| <b>Sample Size:</b>                                               | <p>360 people (2 groups):</p> <p>Intervention (SlowMo) plus Treatment as Usual (TAU); n=180</p> <p>TAU only; n=180</p>                                                                                                                                                                                                                                                                                                                                                                                                                                                                                                                                                                                                                                                                                                                                                                                                                                  |
| <b>Summary Of Eligibility Criteria:</b>                           | <p>Inclusion criteria: persistent (3+ months) distressing paranoia (Green Paranoid Thoughts Scale (GPTS; Green et al., 2008) score &gt;29, persecutory subscale), diagnosis of schizophrenia-spectrum psychosis (F20-29, ICD 10: Present State Examination, version 10), capacity to provide informed consent, sufficient grasp of English to participate in informed consent process, assessments and interventions.</p> <p>Exclusion criteria: Profound visual and/ or hearing impairment; inability to engage in the assessment procedure; currently in receipt of psychological therapy for paranoia; primary diagnosis of substance abuse disorder, personality disorder, organic syndrome or learning disability.</p>                                                                                                                                                                                                                             |
| <b>Intervention (Description, frequency, details of delivery)</b> | SlowMo consists of eight individual, face-to-face sessions (delivered weekly on average), delivered by trained therapists, and assisted by a website with interactive stories and games. SlowMo supports people to                                                                                                                                                                                                                                                                                                                                                                                                                                                                                                                                                                                                                                                                                                                                      |

|                                                    |                                                                                                                                                                                                                                                                                                                                                                                                                                                                                         |
|----------------------------------------------------|-----------------------------------------------------------------------------------------------------------------------------------------------------------------------------------------------------------------------------------------------------------------------------------------------------------------------------------------------------------------------------------------------------------------------------------------------------------------------------------------|
|                                                    | find out how fast thinking habits can contribute to upsetting thoughts, and try out tips to learn what helps them slow down their thinking and cope with worries. Personalised session content is synchronised with a mobile app to support people to make use of strategies learnt in their daily life.                                                                                                                                                                                |
| <b>Comparator Intervention:</b>                    | Treatment as usual (TAU) only:<br>N.B All participants will receive TAU. We define usual care with reference to best practice guidance, specifically NICE guidance on community mental health treatment for people with psychosis and the standards of community care required by the Care Quality Commission. Participation will not alter normal treatment decisions about medication and additional psychosocial interventions which remain the responsibility of the clinical team. |
| <b>Maximum Duration Of Treatment Of A Subject:</b> | Time taken to complete the 8 sessions- typically period between randomisation and 12-week follow up.                                                                                                                                                                                                                                                                                                                                                                                    |
| <b>Version And Date Of Final Protocol:</b>         | Version 1.0; 26/09/2016                                                                                                                                                                                                                                                                                                                                                                                                                                                                 |
| <b>Version And Date Of Protocol Amendments:</b>    |                                                                                                                                                                                                                                                                                                                                                                                                                                                                                         |

41

42

43 **3. Revision History**

| Document ID - (Document Title) revision X.Y | Description of changes from previous revision | Effective Date |
|---------------------------------------------|-----------------------------------------------|----------------|
|                                             |                                               |                |
|                                             |                                               |                |

44

45

46

47 **4. Protocol Contents**

48

49 **1. PROTOCOL FULL TITLE: THE SLOWMO TRIAL: A RANDOMISED CONTROLLED TRIAL OF A**  
50 **DIGITAL THERAPY FOR PEOPLE WHO FEAR HARM FROM OTHERS ..... 3**

51 **2. STUDY SYNOPSIS ..... 6**

52 **3. REVISION HISTORY ..... 8**

53 **4. PROTOCOL CONTENTS..... 8**

54 **5. BACKGROUND & RATIONALE..... 11**

55 **6. TRIAL OBJECTIVES AND DESIGN..... 12**

56 6.1 TRIAL OBJECTIVES ..... 12

57 6.2 FOLLOW-UPS/ ENDPOINTS ..... 12

58 6.3 TRIAL DESIGN ..... 12

59 6.4 TRIAL FLOWCHART ..... 13

60 **7. TRIAL INTERVENTION ..... 13**



|     |            |                                                               |           |
|-----|------------|---------------------------------------------------------------|-----------|
| 61  | 7.1        | THERAPY/INTERVENTION DETAILS.....                             | 13        |
| 62  | 7.2        | FREQUENCY AND DURATION OF INTERVENTION.....                   | 14        |
| 63  | 7.3        | INTERVENTION RECORDS.....                                     | 15        |
| 64  | 7.4        | SUBJECT COMPLIANCE.....                                       | 15        |
| 65  | 7.5        | STUDY ADHERENCE.....                                          | 15        |
| 66  | 7.6        | CONCOMITANT MEDICATION.....                                   | 15        |
| 67  | <b>8.</b>  | <b>RESEARCH ENVIRONMENT.....</b>                              | <b>15</b> |
| 68  | <b>9.</b>  | <b>SELECTION AND WITHDRAWAL OF SUBJECTS.....</b>              | <b>16</b> |
| 69  | 9.1        | INCLUSION CRITERIA.....                                       | 16        |
| 70  | 9.2        | EXCLUSION CRITERIA.....                                       | 16        |
| 71  | 9.3        | SELECTION OF PARTICIPANTS.....                                | 16        |
| 72  | 9.4        | RANDOMISATION PROCEDURE / CODE BREAK.....                     | 16        |
| 73  | 9.5        | WITHDRAWAL OF SUBJECTS.....                                   | 16        |
| 74  | 9.6        | EXPECTED DURATION OF TRIAL.....                               | 17        |
| 75  | <b>10.</b> | <b>TRIAL PROCEDURES.....</b>                                  | <b>19</b> |
| 76  | 10.1       | BY VISIT.....                                                 | 19        |
| 77  | 10.2       | LABORATORY TESTS.....                                         | 20        |
| 78  | <b>11.</b> | <b>ASSESSMENT OF EFFICACY.....</b>                            | <b>20</b> |
| 79  | 11.1       | PRIMARY OUTCOME.....                                          | 20        |
| 80  | 11.2       | SECONDARY OUTCOME.....                                        | 20        |
| 81  | 11.3       | PROCEDURES FOR ASSESSING EFFICACY PARAMETERS.....             | 20        |
| 82  | <b>12.</b> | <b>ASSESSMENT OF SAFETY.....</b>                              | <b>20</b> |
| 83  | 12.1       | SPECIFICATION, TIMING AND RECORDING OF SAFETY PARAMETERS..... | 20        |
| 84  | 12.2       | PROCEDURES FOR RECORDING AND REPORTING ADVERSE EVENTS.....    | 20        |
| 85  | 12.3       | ADVERSE EVENTS THAT DO NOT REQUIRE REPORTING.....             | 21        |
| 86  | 12.4       | STOPPING RULES.....                                           | 22        |
| 87  | <b>13.</b> | <b>STATISTICS.....</b>                                        | <b>22</b> |
| 88  | 13.1       | SAMPLE SIZE.....                                              | 22        |
| 89  | 13.2       | RANDOMISATION.....                                            | 22        |
| 90  | 13.3       | ANALYSIS.....                                                 | 22        |
| 91  | <b>14.</b> | <b>TRIAL STEERING COMMITTEE.....</b>                          | <b>23</b> |
| 92  | <b>15.</b> | <b>DATA MONITORING COMMITTEE.....</b>                         | <b>23</b> |
| 93  | <b>16.</b> | <b>DIRECT ACCESS TO SOURCE DATA AND DOCUMENTS.....</b>        | <b>23</b> |
| 94  | <b>17.</b> | <b>ETHICS &amp; REGULATORY APPROVALS.....</b>                 | <b>23</b> |
| 95  | <b>18.</b> | <b>QUALITY ASSURANCE.....</b>                                 | <b>24</b> |
| 96  | <b>19.</b> | <b>DATA HANDLING.....</b>                                     | <b>24</b> |
| 97  | <b>20.</b> | <b>DATA MANAGEMENT.....</b>                                   | <b>25</b> |
| 98  | <b>21.</b> | <b>PUBLICATION POLICY.....</b>                                | <b>25</b> |
| 99  | <b>22.</b> | <b>INSURANCE / INDEMNITY.....</b>                             | <b>25</b> |
| 100 | <b>23.</b> | <b>FINANCIAL ASPECTS.....</b>                                 | <b>25</b> |
| 101 | <b>24.</b> | <b>SIGNATURES.....</b>                                        | <b>26</b> |
| 102 | <b>25.</b> | <b>REFERENCES.....</b>                                        | <b>27</b> |
| 103 | <b>26.</b> | <b>APPENDIXES.....</b>                                        | <b>29</b> |

105

106

107

108

109

## 110 5. Background & Rationale

111

112 *‘Every day, I think they are following me and am terrified that they will kill me.’*

113

114 ‘Ben’ believes he is in danger. When someone looks at him in the street he decides he is under attack. He rushes home  
115 and avoids going out. People often experience distressing fears about other people intentionally causing harm, which is  
116 also known as paranoia (Freeman et al., 2005). Paranoia severity lies on a continuum, and can range from fleeting ideas  
117 that someone on the street might be laughing at us, to more elaborate and persistent beliefs (sometimes called  
118 persecutory delusions) such as that the secret services are trying to have us killed. Paranoia is one of the most common  
119 symptoms of schizophrenia-spectrum disorders and is associated with significant distress and disruption to the person’s  
120 life. This results in increased use of services, including inpatient admissions and high costs to mental health care  
121 providers. Developing effective interventions for paranoia is therefore a clinical priority. NICE (2014) recommend  
122 cognitive-behavioural therapy for psychosis (CBTp), including paranoia. However, there are significant challenges to  
123 access, engagement, adherence and effectiveness (Freeman et al., 2013; Haddock et al., 2013). CBTp has relatively  
124 high training and delivery costs, which limits access, and even when available, people can struggle to understand,  
125 remember and apply strategies learnt during therapy. Recent meta-analytical studies of CBTp have found small- to  
126 medium-sized beneficial effects on paranoia, and a pressing target of research is therefore to improve outcomes (van der  
127 Gaag et al., 2014). Our new therapy, SlowMo aims to address these identified challenges, specifically in terms of  
128 improving the appeal, ease of use and clinical effectiveness for people who fear harm from others.

129

130 Our research group has adopted an interventionist causal approach to improving therapy effectiveness, which involves  
131 developing tailored interventions to target the specific mechanisms that research has shown to play a causal role in  
132 paranoia. These mechanisms include thinking habits, worry processes, negative self-beliefs, safety behaviours, and  
133 sleep dysfunction (Freeman, 2016). Interventions targeting each of these mechanisms are all anticipated to reduce  
134 paranoia severity, albeit it through different pathways, given the multifactorial causality of paranoia. For example, a  
135 recent randomised controlled trial of a brief intervention focused on worry processes demonstrated that reductions in  
136 this mechanism accounted for improvements in paranoia (Freeman et al, 2015). In contrast, SlowMo works by  
137 targeting a certain type of thinking habit, which can be considered *fast thinking* (Garety et al., 2015; Kahneman, 2011).  
138 Fast thinking is characterised by focusing on too little information (‘jumping to conclusions’) and belief inflexibility  
139 (high conviction in thoughts and a lack of consideration of alternative ideas), and has been robustly associated with  
140 paranoia (Garety et al, 2014; Dudley et al., 2015; McLean et al., 2016; So et al., 2012). When Ben feels in danger, he is  
141 sure of what is happening based on his instincts, does not look for more information or consider other possible ideas.  
142 SlowMo aims to help people like Ben by supporting them to notice their upsetting worries and fast thinking habits, and  
143 then provides tips to help them *slow down for a moment* to focus on new information and develop safer thoughts.

144

145 We have iteratively developed SlowMo over the past 10 years, and now have sufficient proof-of-concept, feasibility and  
146 acceptability evidence from four preliminary studies to test the intervention in a randomised controlled trial (Ross et al.,  
147 2009; Waller et al., 2011; Garety et al., 2014; Waller et al. 2015). In three randomised studies and one case series, we  
148 found that reductions in unhelpful fast thinking account for improvements in paranoia severity, and that the intervention  
149 is highly acceptable. Our pilot data indicate very promising large effects on paranoia severity.

150

151 SlowMo has been developed from a user-centred inclusive design approach, to address the challenges to therapy  
152 engagement and adherence for people with severe mental health problems. It consists of an easy to use and enjoyable  
153 digital interface, thereby harnessing the potential of technology for improving health-related outcomes and reducing  
154 costs, in line with the ‘NHS Five Year Forward View’ (Hollis et al, 2015; NHS England, 2014). Thoughts are  
155 visualised as bubbles, with different speeds, sizes and colours, to reflect different thinking habits, levels of distress and  
156 coping tips. This simple metaphor makes it easier for people to understand thoughts are transient, and that by using  
157 coping strategies we can modify them. An interactive digital interface assists the delivery of face-to-face sessions,  
158 which are synchronised with a mobile app for use in daily life. Our design approach was informed by the Design  
159 Council’s (2005) double diamond method consisting of discover, define, develop and deliver phases. As an inclusive  
160 design project, stakeholders (service users, clinicians and researchers) were involved from the outset, with iterative  
161 interviews, observation of therapy sessions, and system mapping of service contexts. This led to the development of a  
162 design brief, followed by iterative concept generation and prototype testing with service users. Feasibility testing of  
163 SlowMo has been extremely positive, with people indicating they significantly prefer the digital interface to  
164 conventional therapy materials.

165

166 Given its established evidence base and comprehensive user-centred design, SlowMo is expected to be highly  
167 acceptable and to lead to clinically worthwhile gains, reducing paranoia distress, conviction and preoccupation,  
168 enhancing wellbeing, and improving quality of life. It is anticipated to reduce service use, including inpatient  
169 admissions for the duration of the trial assessment period. The data from this study will also add significantly to our  
170 understanding of psychological mechanisms and change processes in paranoia. We will test our hypothesis that changes  
171 in fast thinking mediate changes in paranoia severity. In line with our interventionist causal approach, worry is not  
172 hypothesised to be a mediator as it is not targeted in the SlowMo intervention, but any observed effects will be  
173 explored. As well as providing valuable information for treatment development, evidence of mechanisms of action will  
174 inform the theoretical understanding of paranoia in a way that may itself shape future therapeutic initiatives. In addition,  
175 we have preliminary evidence of modifiers of treatment effects that we will investigate further. We will examine  
176 whether characteristics of participants (including working memory and negative symptoms) moderate the effects of the  
177 intervention on fast thinking, and also the effect on treatment of receipt of an adequate dose of treatment and therapy  
178 adherence. Finally, the trial will be the first to examine the usability and adherence of digital therapies in a large sample  
179 of people affected by severe mental health difficulties. The findings therefore have the potential to inform future  
180 stratified medicine approaches, and the development of more targeted therapies.

## 181 **6. Trial Objectives and Design**

### 182 6.1 Trial Objectives

#### 183 **Aims**

184 We aim to test the clinical efficacy of SlowMo and determine the mechanism through which it reduces paranoia  
185 severity, over 24 weeks, and to identify participant characteristics that moderate its effectiveness (either by moderating  
186 the degree of change in the mechanism, or by influencing adherence to the intervention).

187

188 The main research questions are as follows:

- 189 1. Is SlowMo efficacious in reducing paranoia severity over 24 weeks, when added to treatment as usual (TAU), in  
190 comparison to TAU alone?
- 191 2. Does SlowMo reduce paranoia severity by improving fast thinking (reducing belief inflexibility and jumping to  
192 conclusions)?
- 193 3. Do participant characteristics (i.e. their cognitive capacities, specifically working memory and thinking habits; and  
194 their symptoms, specifically negative symptoms) moderate the effects of the intervention?
- 195 4. Does outcome differ by adherence to the intervention and is adherence predicted by the participants' beliefs about  
196 their illness and about the intervention?
- 197 5. Does the SlowMo digital therapy platform have acceptable rates of usability, acceptability and adherence?
- 198 6. Does SlowMo reduce worry?

#### 199 **Hypotheses**

200 Primary hypotheses:

- 201 1. The intervention will reduce paranoia severity over 24 weeks.
- 202 2. Fast thinking (belief inflexibility and jumping to conclusions) will improve in response to the intervention.
- 203 3. Reductions in fast thinking will mediate positive change in paranoia severity.

204

205 Secondary hypotheses:

- 206 4. Poorer working memory and more severe negative symptoms will negatively moderate treatment effects.
- 207 5. Therapy adherence will moderate the effects of treatment on outcome and adherence will be predicted by beliefs  
208 about mental health problems.
- 209 6. Worry will not mediate reductions in paranoia severity

### 210 6.2 Follow-ups/ endpoints

211 Outcomes will be assessed over 24 weeks (first follow-up occurs at 12 weeks).

### 212 6.3 Trial Design

213 **Design:** A parallel-group randomised controlled trial, with 1:1 allocation and blinded assessors, to test the efficacy of  
214 the SlowMo intervention in reducing paranoia severity when added to standardised Treatment As Usual (TAU).

215 Independent randomisation (King’s Clinical Trials Unit) will use randomly varying permuted blocks, stratified by site  
216 and baseline paranoia severity. Research workers will be blind to therapy allocation, to facilitate completion of unbiased  
217 and objective assessments. Adherence to the blindness procedure will be supported by the research co-ordinator and  
218 therapists having responsibility for the randomisation process, and informing participants of randomisation outcome.  
219 Further, the blinding procedure will be explained to participants and they will be reminded not to inform research  
220 workers of therapy allocation. Breaks in blinding will be monitored and recorded.

## 221 6.4 Trial Flowchart

222 Please refer to Appendix 1 for trial/ recruitment flow-chart and Section 11.1 for details of assessment at each visit.

## 223 7. Trial Intervention

### 224 7.1 Therapy/Intervention Details

225 **Intervention:** SlowMo consists of eight individual, face-to-face sessions, delivered by trained therapists, assisted by a  
226 website with interactive stories and games (see Figure One for examples on the session content). SlowMo supports  
227 people to find out how fast thinking habits can contribute to upsetting thoughts, and try out tips to learn what helps them  
228 slow down their thinking and cope with worries. Personalised session content is synchronised with a mobile app to  
229 support people to make use of strategies learnt in their daily life (see Figure Two for examples of the app content). The  
230 first two sessions involve learning that worries about others and fast thinking are common, and developing an  
231 individualised understanding of the person’s thoughts and thinking habits. The concepts of ‘thinking fast’ and ‘thinking  
232 slow’ are introduced. It is explained that everyone thinks fast at times, and this can be helpful although at other times  
233 thinking fast can mean we feel worried when we do not need to be. Participants learn that thinking slow can be helpful  
234 in dealing with stress and worries about other people. This key principle frames the remaining 6 sessions where people  
235 are supported to find out about and try out tips to *slow down for a moment*, such as the impact of mood and past  
236 experiences on paranoia.

237

238 Figure One. Examples of the website content to support delivery of face-to-face sessions.

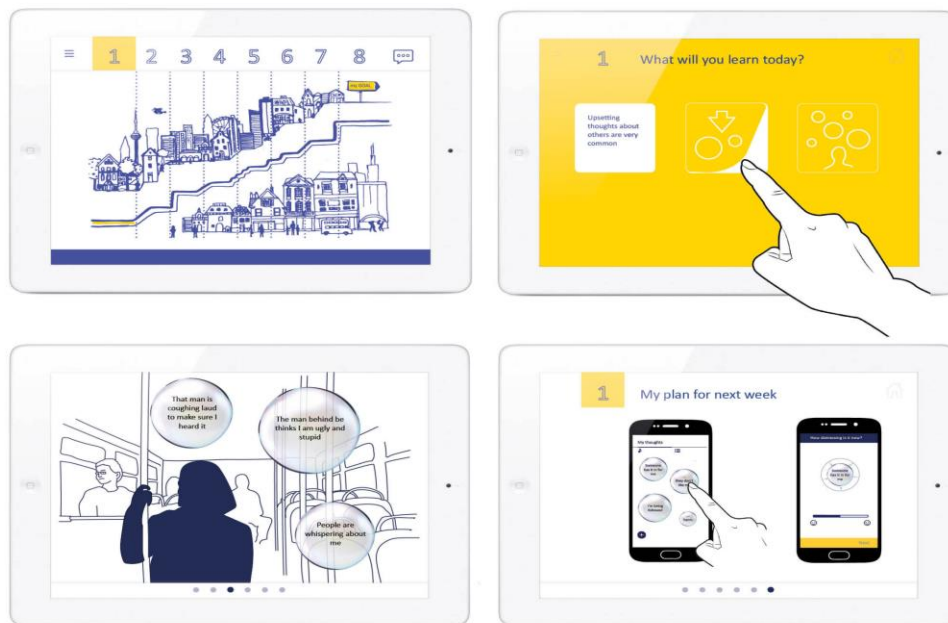

239

240 Figure Two. Examples of the app content to support self-management in daily life.

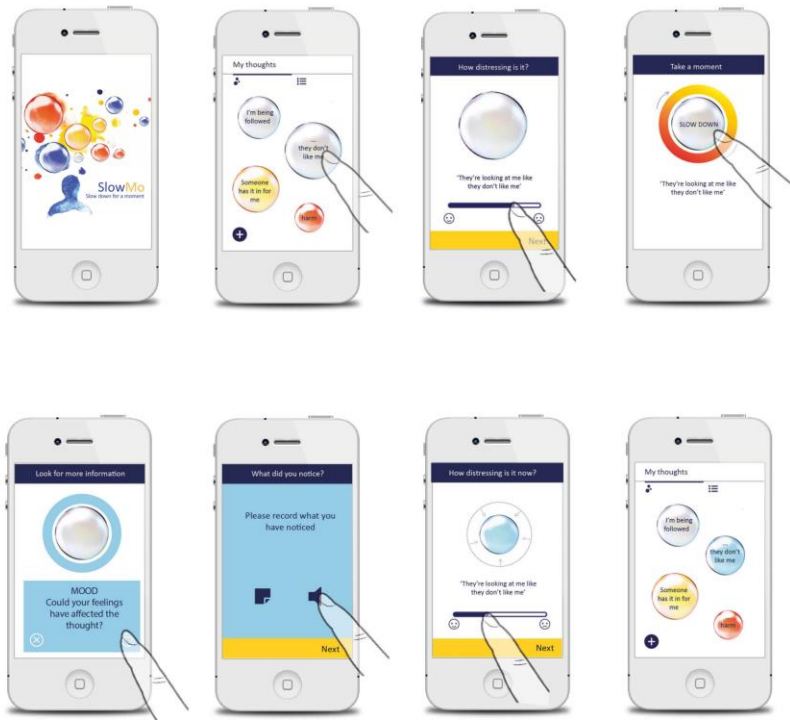

241

242 There is an emphasis throughout the intervention on practicing using the skills inside and outside of sessions.  
 243 Participants build confidence in being able to manage paranoia, feeling safer in their daily life and working towards a  
 244 valued goal. Security and privacy of information stored on the app has been considered throughout its development,  
 245 with the functionality only allowing sharing of information with people's informed consent and no personally  
 246 identifiable information being stored. If people agree, app usage can be synchronised with the digital platform and  
 247 guides the subsequent sessions. The final session provides an opportunity for the participant to reflect on what has been  
 248 learnt, progress made towards goals, and make plans for how they can continue to slow down their thinking and make  
 249 use of coping tips in the future. The digital platform allows session-by-session monitoring of distress, conviction,  
 250 preoccupation and general wellbeing which helps to monitor progress and tailor sessions according to participants'  
 251 needs. Given the novelty of the digital platform therapy, usability and acceptability will be assessed through system  
 252 analytics data on the use of the platform, a post-therapy assessment of participants' experience with a semi-structured  
 253 interview and the User Experience Survey (adapted from Ben-Zeev et al, 2014) and a service-user led qualitative  
 254 interview with a sub-sample of those receiving SlowMo (n = 20).

255

256 During the trial, therapy will be delivered by trained and experienced therapists, with expertise in working with this  
 257 client group, who will attend peer supervision with the project team for the duration of the studies. The therapy will not  
 258 interfere with the usual care offered through mental health services and no attempt to control the delivery of other  
 259 services to either group will be made. The only exception to this will be if a person is currently receiving psychological  
 260 interventions from another source, in which case we will liaise carefully with the participant and their therapist prior to  
 261 randomisation to ensure that engagement in two psychological therapies is not overwhelming, confusing or unhelpful.

262 7.2 Frequency and duration of intervention

263 PROCEDURE: RECRUITMENT, INFORMED CONSENT AND RESEARCH ASSESSMENTS

264 Potential participants will be identified by close liaison between research workers and staff in clinical teams. Potential  
 265 participants will be screened for suitability to see if they meet the initial eligibility criteria. Service users meeting these  
 266 study criteria will be briefly introduced to the research by their clinician to see if they wish to give verbal consent to  
 267 meet with the research worker and commence the remainder of the screening and informed consent process.  
 268 Alternatively, potential participants may contact the researcher directly through responding to posters promoting the  
 269 study displayed in community health team bases. If this is the case, the research worker will then complete the initial  
 270 screen of the service user for suitability to participate, through discussion with the service user's clinician, before  
 271 arranging to meet them to complete the screening process and commence the informed consent process. Potential

272 participants will be given the opportunity to discuss the study and at least 24 hours to decide whether to participate. The  
273 research worker will also assess capacity to provide consent to participate. Throughout the recruitment and research  
274 process all efforts will be made to tailor to participants' needs and preferences.

275 Service users who consent to participate will then complete a range of self-report and interview based measures  
276 involving questions about paranoia severity, wellbeing, self-esteem, quality of life, service use, worry and mood.  
277 Assessments will be done at baseline, after treatment at 12 weeks, and at 24-week follow-up. These assessments will be  
278 administered by trained local research workers, who will be supervised by experienced research clinical psychologists.  
279 Assessments will be conducted at locations convenient for the participant (at either NHS, University or residential  
280 locations). The research worker will inform the research coordinator when the baseline assessments have been  
281 completed, and the participant will then be randomised to either the SlowMo intervention or Treatment as Usual (TAU).  
282 The research coordinator or research therapist will meet with the participant to inform them of the outcome of  
283 randomisation and remind them about not informing the research worker of the allocation during the follow-up  
284 assessments. Participants will meet with the research workers again at 12 and 24 weeks following randomisation to  
285 complete follow-up assessments.

286 FOR PARTICIPANTS RANDOMISED TO TAU ONLY:

287 N.B All participants (in both groups) will receive TAU.

288 We define usual care with reference to best practice guidance, specifically NICE guidance on community mental health  
289 treatment for people with psychosis and the standards of community care required by the Care Quality Commission.  
290 Participation will not alter usual treatment decisions about medication and additional psychosocial interventions which  
291 remain the responsibility of the clinical team.

292 FOR PARTICIPANTS RANDOMISED TO SLOWMO IN ADDITION TO TAU:

293 SlowMo consists of eight individual, face-to-face sessions, delivered by trained therapists, assisted by a website with  
294 interactive stories and games. It is anticipated that face-to-face sessions will mostly be conducted at a local community  
295 clinical team setting. However the intervention is portable and therefore location can be changed in line with participant  
296 preference.

297 7.3 Intervention records

298 Assessments and therapy sessions will be audiotaped (after first establishing consent) to allow for assessment of  
299 adherence to the research protocol and assessment ratings. Relevant information concerning meetings with the project  
300 worker or therapist will be recorded in the participants' electronic notes system.

301 7.4 Subject Compliance.

302 Compliance will be determined by the participants' attendance at sessions and by system analytic data on engagement  
303 with the digital intervention.

304 7.5 Study adherence

305 Each session will be recorded and the following will be assessed:

- 306 1) Treatment adherence: sessions attended and system analytics data on website and app use.
- 307 2) Therapy adherence (including digital recording of in-session tasks and use of app for self-monitoring and  
308 exercises)
- 309 3) Therapist competence and fidelity to the manual.

310 7.6 Concomitant Medication

311 Participation will not alter usual treatment decisions about medication and additional interventions which remain the  
312 responsibility of the clinical team.

## 313 8. Research environment

314 The three main University trial sites are the Institute of Psychiatry, Psychology and Neuroscience, (King's College  
315 London), Oxford University and Sussex University. Participants will be recruited from mental health services  
316 associated with each University site with similar procedures followed at each site: South London and Maudsley NHS  
317 Foundation Trust, Sussex Partnership NHS Foundation Trust, and Oxford Health NHS Foundation Trust. Two  
318 additional PICs have been identified per site to be used as required: Oxford site- Berkshire Healthcare NHS Foundation  
319 Trust and Northamptonshire Healthcare NHS Foundation Trust; London site-South West London and St George's and  
320 Oxleas NHS Trust; Sussex site- Surrey & Borders Partnership NHS Foundation Trust and Kent & Medway NHS &

321 Social Care Partnership Trust. All measures and procedures, apart from therapy-specific assessments, will be  
322 administered by trained local research workers, who will be supervised by experienced research clinical psychologists.  
323 Assessments and therapy will be conducted at locations convenient for the participant (at either NHS, University or  
324 residential locations) and will be audiotaped to allow for reliability checks for adherence to the research protocol and  
325 assessment ratings. Please see Table One for an overview of the assessment battery.

## 326 9. Selection and Withdrawal of Subjects

### 327 9.1 Inclusion Criteria

328 Persistent (3+ months) distressing paranoia (Green Paranoid Thoughts Scale (GPTS; Green et al., 2008) score >29,  
329 persecutory subscale), diagnosis of schizophrenia-spectrum psychosis (F20-29, ICD 10: Present State Examination,  
330 version 10), capacity to provide informed consent, sufficient grasp of English to participate in informed consent  
331 process, assessments and interventions.

### 332 9.2 Exclusion Criteria

333 Profound visual and/ or hearing impairment; inability to engage in the assessment procedure; currently in receipt of  
334 other psychological therapy for paranoia; primary diagnosis of substance abuse disorder, personality disorder, organic  
335 syndrome or learning disability.

### 336 9.3 Selection of Participants

337 **Recruitment:** Participants will be recruited from mental health services across three main trial sites with similar  
338 procedures followed at each site: South London and Maudsley NHS Foundation Trust, Sussex Partnership NHS  
339 Foundation Trust, and Oxford Health NHS Foundation Trust. Participants will be identified through close liaison with  
340 clinical staff. Clinicians will need to obtain verbal consent from potential participants to be contacted by a study  
341 research worker, but no further demands will be placed on their time. After clinical staff have confirmed that a potential  
342 participant is suitable to be approached (i.e. meets study criteria and no clinical contra-indications) Research Workers  
343 will meet each potential participant to discuss the study, provide written information, respond to questions and seek  
344 written informed consent.

345

346 Additional sources of recruitment:

347 1) Consent for Contact (C4C) provides access to existing research recruitment databases- e.g. South London and  
348 Maudsley (SLaM) Clinical Record Interactive Search (CRIS), an IT system which anonymises and provides authorised  
349 researchers with access to SLaM's 230,000 electronic health records. Sussex Partnership Trust is also currently setting  
350 up an opt-out system for consent to be contacted about research projects, scheduled to start in 2017, which should aid  
351 recruitment.

352

353 2) Patient Identification Centres (PIC) sites- two additional PICs have been identified per site to be used as required:  
354 Oxford site- Berkshire Healthcare NHS Foundation Trust and Northamptonshire Healthcare NHS Foundation Trust;  
355 London site-South West London and St George's and Oxleas NHS Trust; Sussex site- Surrey & Borders Partnership  
356 NHS Foundation Trust and Kent & Medway NHS & Social Care Partnership Trust.

357

358 3) Through direct patient approach: we intend to place recruitment posters in the main clinical areas of the specialist  
359 mental health teams. This will give details of the study. Although the poster asks participants to approach the research  
360 staff via their clinical team, we know from experience in the pilot that some will make a direct approach. Additional  
361 self-referrals are also possible as a result of interest generated through media/ public engagement events. In all such  
362 instances we will contact the relevant clinical team and discuss suitability for participation.

### 363 9.4 Randomisation Procedure / Code Break

364 Independent randomisation (King's Clinical Trials Unit) will use randomly varying permuted blocks, stratified by site  
365 and baseline paranoia severity.

### 366 9.5 Withdrawal of Subjects

367 Participants have the right to withdraw from the study at any time for any reason. The investigator also has the right to  
368 withdraw patients from the study in the event of clinical contra-indications. It is understood by all concerned that an  
369 excessive rate of withdrawals can render the study uninterpretable; therefore, unnecessary withdrawal of participants



370 should be avoided. Should a participant decide to withdraw from the study, all efforts will be made to report the reason  
371 for withdrawal as thoroughly as possible. Should a participant withdraw from therapy only, efforts will be made to  
372 continue to obtain follow-up data, with the permission of the patient.

373 9.6 Expected Duration of Trial.

374 The participation of each person within the trial will be 6 months from assessment/ randomisation until the 24 week  
375 follow-up.

#### 376 **Timescale**

377 The study will take 31 months in 4 stages (with an additional preparatory stage 6 months  
378 beforehand).

379

380 **Stage 0 Preparatory stage in the six months before start:** Detailed Trial Protocol drafted; Ethics and all R&D  
381 approvals applied for and granted; digital intervention and app redesign completed by end of May 2016; identification  
382 of trust therapists; initiation of coordinator recruitment; initiation of research worker recruitment; preparation of  
383 participant recruitment; computers and digital equipment ordered.

384 *Milestone 1 Digital intervention and app re-design completed by end of May 2016*

385

386 **Stage 1 Months 1-3 Final set up:** Staff recruitment completed and training completed, therapists trained and site-  
387 specific testing of digital platform completed. Participant recruitment initiated, including publicity campaign, visits to  
388 participating teams. Trial management folder and all essential trial documentation created; protocol finalised. Staff will  
389 be in post (trial and site coordinators on day 1 and research workers by the end of month 2 (all staff recruitment having  
390 commenced in preparatory phase). Trial therapists (previously identified) will be in place from start and will be trained  
391 in the first two months.

392 *Milestone 2 Ethics and R&D approvals in place before start of month 1*

393 *Milestone 3 end month 3 Protocol submitted for publication.*

394

395 **Stage 2 Months 4-24 Participant recruitment and treatment delivery:** Participant recruitment initiated, monitored and  
396 completed and treatment delivered without delay following randomisation. Data completion rates monitored. Participant  
397 recruitment (18 months: months 4-21) commences.

398 *Milestone 4 end month 4: participant recruitment commenced in three sites*

399 *Milestone 5 end of month 6 Statistical Analysis Plan completed*

400 *Milestone 6 end month 7: 72 participants recruited, min 20 in each site. If Milestone 6 target not met in any site,*  
401 *activate additional recruitment sites in neighbouring Trusts*

402 *Milestone 7 end month 13: 192 participants recruited; 90 commenced treatment. If Milestone 7 not met, activate*  
403 *additional recruitment sites*

404 *Milestone 8 end month 21: 360 recruited (End of recruitment)*

405 *Milestone 9 end of month 24 All treatment completed*

406

407 **Stage 3 Months 25-27 Database completion and checking:** All follow-up data collected. All baseline, 12 week and 24  
408 week data correctly entered, checked, cleaned and data base locked ready for analysis

409 *Milestone 10 end of month 27 All follow ups (24 weeks) completed; database fully checked, cleaned and locked.*

410 **Stage 4 Months 28-31 Final analysis and writing up.** Data analysis, write up and initial dissemination. *Milestone 11*  
411 *End of month 30 final report drafted.*

412  
413

**Project Gantt Chart:**

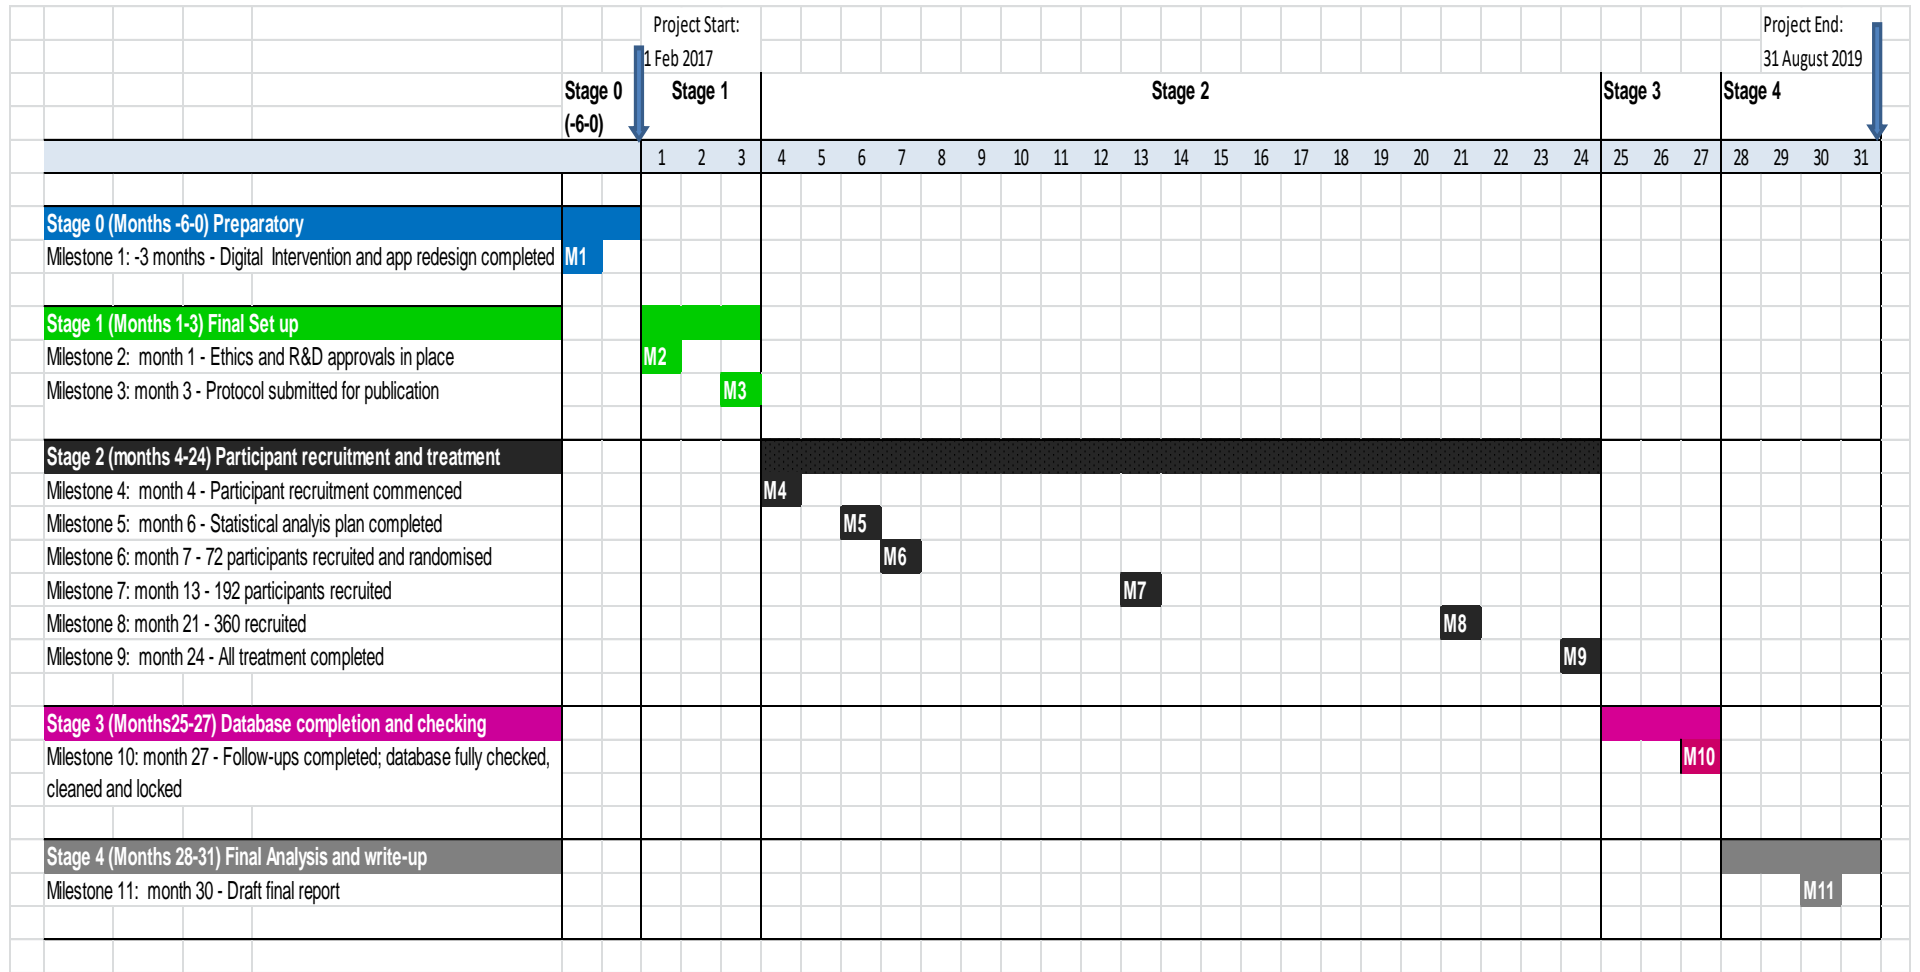

414

415

416 **10. Trial Procedures**

## 417 10.1 By Visit

418

419 Table One. Overview of assessment battery

| Measure type                                           | Measure                                                                                                                                                                                                                                                                                                                                                   | Time-point*           |
|--------------------------------------------------------|-----------------------------------------------------------------------------------------------------------------------------------------------------------------------------------------------------------------------------------------------------------------------------------------------------------------------------------------------------------|-----------------------|
| Paranoia screening for eligibility and primary outcome | Green Paranoid Thoughts Scale (GPTS). Green et al. (2008).                                                                                                                                                                                                                                                                                                | Screening,<br>1, 2, 3 |
| Other paranoia outcome measures                        | The Psychotic Symptom Rating Scales (PSYRATS) – a dimensional measure of delusions. Haddock et al. (1999). Amended to include visual analogue scale ratings (0-100) of belief conviction, distress and preoccupation.<br><br>Persecutory delusions and ideas of reference items from Scales for Assessment of Positive Symptoms (SAPS). Andreasen (1984). | 1, 2, 3               |
| Fast thinking measures <sup>1</sup>                    | Maudsley Assessment of Delusional Beliefs (MADS): Possibility of Being Mistaken (PM). Wessely et al. (1993).                                                                                                                                                                                                                                              | 1, 2, 3               |
|                                                        | Explanation for Experiences. Freeman et al. (2004).                                                                                                                                                                                                                                                                                                       | 1, 2, 3               |
|                                                        | The Jumping to Conclusions Reasoning Test. Beads in ratios 60:40 and 85:15 Garety et al. (1991).                                                                                                                                                                                                                                                          | 1, 2, 3               |
| Other problems and processes                           | Scales for Assessment of Positive Symptoms (SAPS). Andreasen (1984).                                                                                                                                                                                                                                                                                      | 1                     |
|                                                        | Brief Negative Symptom Scale (BNSS). Kilpatrick et al. (2011).                                                                                                                                                                                                                                                                                            | 1                     |
|                                                        | Beliefs about Problems Questionnaire. Marcus et al. (2014).                                                                                                                                                                                                                                                                                               | 1                     |
|                                                        | Letter Number Sequencing Test from the Wechsler Adult Intelligence Scale (WAIS). (Wechsler et al., 1997)                                                                                                                                                                                                                                                  | 1                     |
|                                                        | Trail Making Task- A&B (Lezak 2004)                                                                                                                                                                                                                                                                                                                       | 1                     |
|                                                        | TAPS (Thinking about Paranoia Scale); Hardy et al. (in prep)                                                                                                                                                                                                                                                                                              | 1, 2, 3               |
|                                                        | Penn State Worry Questionnaire (Meyer et al. 1990)                                                                                                                                                                                                                                                                                                        | 1, 2, 3               |
|                                                        | Brief Core Schema Scales (BCSS). Fowler et al. (2006).                                                                                                                                                                                                                                                                                                    | 1, 2, 3               |
|                                                        | Perception of carer criticism (adapted from                                                                                                                                                                                                                                                                                                               | 1                     |

|  |                                                                                                                                        |         |
|--|----------------------------------------------------------------------------------------------------------------------------------------|---------|
|  | Hooley et al., 1989)                                                                                                                   |         |
|  | The Warwick-Edinburgh Mental Well-being Scale (WEMWBS). Tennant et al. (2006).                                                         | 1, 2, 3 |
|  | Short Assessment of Quality of Life (MANSA, Priebe et al 1999)                                                                         | 1, 2, 3 |
|  | Client Service Receipt Inventory including medication, bed and crisis team days, contact with criminal justice system. Beecham (1995). | 1, 3    |

420

421 10.2 Laboratory Tests

422

423 N/A

#### 424 11. Assessment of Efficacy

425 Participants will complete a range of self-report and interview based measures to assess the impact of the  
426 interventions on outcomes, the hypothesised mediators and other key processes implicated in paranoia and  
427 response to therapy (See Table 1 above for full details).

428 11.1 Primary outcome

429 The primary outcome is change in paranoia severity over 24 weeks.

430 11.2 Secondary outcome

431 Secondary outcomes include wellbeing, self-esteem, quality of life, service use, worry and standard mood and  
432 symptom assessments.

433 11.3 Procedures for Assessing Efficacy Parameters

434 N/A

#### 435 12. Assessment of Safety

436 12.1 Specification, Timing and Recording of Safety Parameters.

437 Best practice, professional guideline and local NHS policies for monitoring mental state and risk will be  
438 followed throughout the participants' involvement in the trial and will be facilitated by close liaison with  
439 clinical teams.

440 12.2 Procedures for Recording and Reporting Adverse Events

**Adverse Event (AE):** Any untoward medical occurrence in a subject to whom a therapy has been administered including occurrences which are not necessarily caused by or related to that therapy.

**Adverse Reaction (AR):** Any untoward and unintended response in a subject to a therapy which is related to any duration of therapy administered to that subject.

**Unexpected Adverse Reaction (UAR):** An adverse reaction the nature and severity of which is not consistent with the information known about the therapy in question in the view of the investigator

**Serious adverse Event (SAE), Serious Adverse Reaction (SAR) or Unexpected Serious Adverse Reaction (USAR):** Any adverse event, adverse reaction or unexpected adverse reaction, respectively, that

- Results in death;
- Is life-threatening;

- Required hospitalisation or prolongation of existing hospitalisation;
- Results in persistent or significant disability or incapacity;
- Consists of a congenital anomaly or birth defect.

#### Reporting Responsibilities

All SARs and SUSARs (excepting those specified in this protocol as not requiring reporting) will be reported immediately by the Chief Investigator to the R&D office

**Safety and adverse event assessment and monitoring:** It is an important subsidiary goal of the trial to establish the safety of the intervention, and we will also take all appropriate steps during the conduct of the trial for ensuring participant safety. The occurrence of adverse events (AEs) will be monitored actively and systematically, following guidance from the Consolidated Standards of Reporting Trials (CONSORT) with the extension for non-pharmacologic treatment, and the extension for reporting of harms. Medical Research Council Guidelines for Good Practice in Clinical Trials will also be followed to ensure good governance of the trial for integrity and participants' safety and wellbeing. AEs are defined as including deaths; self-harm; serious violent incidents; complaints about therapy; referrals to crisis care or admission to psychiatric hospital during therapy. A standard method of reporting will be employed, categorising events by severity (five grades, A-E). Investigators will also determine relatedness of an event to the intervention based on a temporal relationship, as well as whether the event is unexpected or unexplained given the participant's clinical course, previous conditions and history, and concomitant treatments, in five categories from 'not related' to 'related' (following Linden 2013). The following will be considered as serious adverse events (SAE, Categories A-C): All deaths (category A), incidents which acutely jeopardise the health or psychological wellbeing of the individual, resulting in immediate hospital admission and/or permanent disability (category B), or resulting in injury requiring immediate medical attention (category C). These SAEs will include but are not limited to: 1) Hospital admissions; 2) Home treatment team involvement; 3) Suicide attempts; 4) Any violent incident necessitating police involvement (whether victim or accused); 5) Self-harming behaviour; 6) All deaths.

Reasons for withdrawal from the study will also be recorded. Furthermore, in the event of any AEs and participant withdrawal, the trial coordinator/ site coordinators will review participant clinical notes and contact clinicians for any important additional information. In order to ensure active surveillance of harms, at each assessment point, research workers will actively check for the occurrence of specific AEs using a structured checklist. At the completion of the trial, all medical notes will additionally be checked, for the total duration of enrolment, for any previously undisclosed record of AEs. This is to ensure completeness of records and to address the possibility that the disclosure of adverse events might be greater in the active intervention condition, as a result of the therapeutic relationship. For the final reports of the trial, the numbers, types and severity of AEs by trial condition, as well as discontinuations, will be reported, using descriptive statistics (since there are no pre-specified hypotheses concerning adverse events or harms, and, given the expected low frequency of AEs, the data will not be suitable for an ITT statistical analysis).

All SAEs will be reported immediately to the Chief Investigator and Principal Investigators (for each site) and the independent chair of the Data Monitoring and Ethics Committee (DMEC). All AEs including complaints (from each site) will be pooled and reported monthly to the Trial Management Committee and at each meeting of the DMEC. All relevant protocols for reporting SAEs to the Research Ethics Committee, the research sponsor and the respective local NHS Trust will be followed. Urgent actions concerning participant and staff safety, communication with others, and clinical care will be immediately addressed by the Trial CI and PIs and reported to the Trial Management Committee. At each meeting of the DMEC, or at any time at the request of the DMEC Chair, a full report of AEs will be reviewed. The DMEC will be responsible for investigating further, if there are any concerns about unexpectedly high rates of AEs, which may include being unblinded as to trial condition or seeking further data on adverse events, and will advise the TSC on any ethical or safety reasons why the trial should be prematurely ended.

441 12.3 Adverse events that do not require reporting

442 There are no AEs or SAES that do not require reporting for this trial.

## 443 12.4 Stopping Rules

The trial may be prematurely discontinued by the Sponsor or Chief Investigator on the basis of new safety information or for other reasons given by the Data Monitoring & Ethics Committee / Trial Steering Committee regulatory authority or ethics committee concerned. The trial may also be prematurely discontinued due to lack of recruitment or upon advice from a Trial Steering Committee (if applicable), who will advise on whether to continue or discontinue the study and make a recommendation to the sponsor. If the study is prematurely discontinued, active participants will be informed and no further participant data will be collected.

## 444 13. Statistics

445 Research workers will be blind to therapy allocation, to facilitate completion of unbiased and objective  
446 assessments. Adherence to the blindness procedure will be supported by the research co-ordinator and  
447 therapists having responsibility for the randomisation process, and informing participants of randomisation  
448 outcome. Further, the blinding procedure will be explained to participants and they will be reminded not to  
449 inform research workers of therapy allocation. Breaks in blinding will be monitored and recorded.

### 450 13.1 Sample Size

451 Total n=360 (120 per site):

452 SlowMO plus TAU; n=180

453 TAU only; n=180

454 **Power calculation:** Calculations used CIsampi in Stata. A 10-point reduction in the primary outcome measure  
455 (GTPS) is clinically meaningful; based on a standard deviation of 25, this is a 0.4 effect size (Freeman et al,  
456 2014). We account for: clustering in the SlowMo arm with an ICC=0.01 with 10 therapists (no clustering in the  
457 TAU arm), 1:1 allocation, 0.05 significance level. A simple two-tailed t-test with 150 people per group gives  
458 90% power to detect an effect size of 0.4, and 80% for 0.35. In practice, power will be increased by using  
459 multiple regression. To allow for 20% attrition (conservatively high: our trials in this population had much  
460 lower rates: 5% Freeman et al, 2015; 4% Garety et al, 2008), we will recruit 360 patients at baseline split  
461 equally across 3 sites (120 per site, 60 per arm per site). While powering the study to detect moderate effect  
462 sizes, we anticipate larger effects: our sample is more homogeneous than in standard psychosis trials (being  
463 selected for one key problem: paranoia severity) with substantially less variance in the outcome variable and  
464 larger standardised effect sizes, giving increased power. For mediational analyses, N= 300 has >80% power to  
465 detect a proportion mediated of 40%, and >70% power to detect a proportion mediated of 30%, corresponding  
466 to findings in pilot work (calculated using PowerMediation in R).

### 467 13.2 Randomisation

468 Independent randomisation (King's Clinical Trials Unit) will use randomly varying permuted blocks, stratified  
469 by site and baseline paranoia severity.

### 470 13.3 Analysis

#### 471 Analysis

472 Following CONSORT principles, we will report all participant flow and analyses will be conducted on the  
473 intention-to-treat (ITT) population: all participants randomised regardless of non-compliance with protocol or  
474 withdrawal from the study. Analyses will post-date final follow-up assessments, with due consideration of  
475 potential biases from loss to follow-up.

476

477 The primary analysis will test for a treatment effect on the primary and secondary clinical outcomes. Random  
478 effects regression models allowing for clustering by both participants and therapists will be fitted to the  
479 repeated measures, controlling for treatment site, baseline paranoia severity and the corresponding baseline  
480 assessment for the outcome under investigation. We will allow for missing outcome data under the Missing At  
481 Random assumption (Little and Rubin, 2002); we may also use inverse probability weighting to adjust for non-  
482 adherence to allocated treatment and other intermediate outcomes as predictors of future loss to follow-up  
483 (Dunn et al, 2005).

484

485 Secondary analyses will test treatment-effect mechanisms, moderation and process/adherence effects using  
486 modern causal inference methods (Emsley, Dunn & White, 2010, Dunn et al, 2015). The trial outcomes will  
487 comprise two parallel series of longitudinal data: one for the putative mediators (M) and one for the clinical  
488 outcomes (Y). For the mechanistic analysis, to test for a treatment effect on the putative mediator, we will  
489 replace the clinical outcome with the mechanistic variable as the dependent variable in the random effect  
490 models.

491

492 If we separately demonstrate a treatment effect on both the putative mediator and on the clinical outcome, we  
493 will evaluate mediation in these parallel longitudinal data sets through the use of parallel growth curve and  
494 latent change models (Cheong et al., 2003; MacKinnon, 2008). These models preserve the basic mediation  
495 model by replacing observed variables with latent constructs – the growth factors driving the temporal  
496 responses,  $M_1$  to  $M_p$  and  $Y_1$  to  $Y_p$ . Importantly the mediational structure only applies to the slope growth or  
497 change factors since randomised treatments are independent of the intercept growth factors (baseline values).  
498 Growth curve and latent change models can be estimated by maximum likelihood and other methods using the  
499 software package Mplus (Muthén & Muthén, 1998-2016). The application of these methods to mechanism  
500 evaluation within EME trials is illustrated in Dunn et al (2015), Chapter 4.

501

502 The aim of these analyses is to demonstrate that the effect of treatment on the growth (change) in the clinical  
503 outcome (Y) is explained (caused) by its effect on the growth (change) in the mediator. The major challenge to  
504 a valid inference is that there may be confounding of the mediator and outcome. We will begin by allowing for  
505 baseline values of the mediator and of the clinical outcome, as in the analyses of the successful WIT EME trial  
506 (Freeman et al, 2015) and then check the sensitivity of the results to the possibility of hidden confounding  
507 (unmeasured variables) through the use of instrumental variable methods (Emsley et al, 2010; Dunn et al,  
508 2015).

#### 509 **14. Trial Steering Committee**

510 The Trial Steering Committee (TSC) will meet at least annually and will report to the EME Programme. Its  
511 purpose is to provide overall supervision of the trial, approving the protocol and amendments, monitoring  
512 adherence to the protocol and providing independent advice on all aspects of the trial. Prof Richard Bentall, an  
513 independent international expert in psychological treatment research will be nominated as the chair. The TSC  
514 will include two further independent clinical academics, a service user and the lead investigator. Observers  
515 from the EME Programme will be invited to all TSC meetings.

#### 516 **15. Data Monitoring Committee**

517 A DMEC will be convened and will meet at least annually and report to the TSC. It will have access to all trial  
518 data and will receive regular reports on adverse events. Membership of the DMEC will be independent of the  
519 applicants and of the TSC. Prof Andrew Gumley, an independent international expert experienced in  
520 conducting clinical trials with this population will be nominated as chair and the group will also comprise an  
521 independent senior statistician and another independent senior clinician. The DMEC will be notified of any  
522 serious adverse events as they occur and will consider whether any interim analyses are warranted, review data  
523 and advise the TSC on any ethical or safety reasons why the trial should be prematurely ended.

#### 524 **16. Direct Access to Source Data and Documents**

The Investigator(s) will permit trial-related monitoring, audits and REC review by providing the Sponsor(s),  
and REC direct access to source data and other documents as required.

#### 525 **17. Ethics & Regulatory Approvals**

The trial will be conducted in compliance with the principles of the Declaration of Helsinki (1996), the  
principles of GCP and in accordance with all applicable regulatory requirements including but not limited to  
the Research Governance Framework and the Mental Capacity Act 2005. This protocol and related documents  
will be submitted for review to Camberwell St Giles Research Ethics Committee (REC). The Chief  
Investigator will submit a final report at conclusion of the trial to the funder, the REC and the Sponsor.

## 526 18. Quality Assurance

527 The trial has been carefully designed to ensure compliance with Good Clinical Practice and scientific integrity.  
528 The research programme development, design and implementation will be managed by the Chief Investigator  
529 and the co-applicants, in consultation with service-user consultants and other expert research collaborators  
530 from within and outside of the Chief Investigator's institution. A dedicated Trial coordinator post will assist in  
531 the day-to day management of the project reporting to the Chief investigator, (CI). A trial management  
532 committee (TMC) will meet monthly, its membership will include the investigators and the Trial coordinator  
533 and site coordinators. It will be chaired by the CI and will manage the day-to-day running of the study and  
534 ensure good communication between trial sites, receiving monthly reports from each site on recruitment,  
535 therapy completion, adverse events, reviewing progress against milestones and finding solutions to problems as  
536 they arise. It will oversee the preparation of reports to the Trial Steering Committee (TSC) and Data  
537 Monitoring and Ethics Committee (DMEC). The Chief Investigator and the co-applicants are highly  
538 experienced in working clinically with service users with psychosis, and in carrying out research studies in this  
539 population.

540

## 541 19. Data Handling

The Chief Investigator will act as custodian for the trial data. The following guidelines will be strictly adhered to:

Participant data will be anonymised.

- All anonymised data will be stored on a password-protected computer.
- All trial data will be stored in line with the Data Protection Act.
- and archived in line with Sponsor requirements

### CONFIDENTIALITY/ DATA PROTECTION

Issues relating to confidentiality will be addressed and potential participants will be advised of the limits of confidentiality (i.e. that the researcher will have a duty to inform health professionals if the participant discloses information which highlights any safeguarding or risk issues). The potential participant will be given at least 24 hours to consider all the information provided before written consent can be obtained. Participants will provide informed consent to data being collected on the understanding that information will be confidential and stored in a secure manner (in a locked room in a locked filing cabinet) for the duration of the study, or for longer, only if specific consent has been sought and given for this. A numerical system will be used for computerised information so that individual participants will not be identifiable. After completion of questionnaires and collection of demographic and clinical data, the researcher will destroy information linking participants to their research numbers so that individuals cannot be identified from their data. Participant consent forms will be retained, kept confidential and stored securely. All data will be destroyed following a period of 7 years as determined by relevant information governance policies) after the completion of the trial. It is possible that disclosure of criminal or other acts potentially requiring action will occur during sessions. The research team will be trained in both local and national policies for dealing with such disclosures, and have access to supervisory input to ensure appropriate action is taken. The possibility of action arising from certain disclosures will be clearly noted in the information sheet for participants.

### PRIVACY ISSUES RELATED TO MOBILE APPLICATION ('APP')

We appreciate that use of a mobile application raises potential privacy issues, which we have considered throughout the development phase and are of great importance in mobile healthcare. We have developed the platform in line with the British Standards Institute quality criteria and code of practice for healthcare apps (2015) and guidance from the National Information Board. We have established and are regularly reviewing our risk management strategy and propose setting up a risk register that would be monitored by the trial management committee and data monitoring and ethics committee. Measures to address privacy issues include the informed consent process, which will ensure potential participants are fully aware of what data are collected by the platform, and how data are stored and used. This information will also be available from the



settings menu of the app, which consenting participants can access at any time. Second, all participants will have the opportunity, if they wish, to password protect the handset with a pin number or password. Third, the app does not store or transfer any personal identifiable information. Data transferred over internet transfer protocols will only contain a name (chosen by the person) and a Unique Device Identifier (UDID) which is generated automatically by the system, and will match the anonymised participant number. Any data transferred will also be secured by standard internet transfer protocol security layers. The welcome screen message does contain the participant's chosen name, should they agree to this doing so, however this can also be left blank if they prefer. During this project, the app will run as an offline native app, and therefore will not be connected to any network. App data will be synched during therapy sessions, over secure connections and stored on a password protected, secure database. It is of note that to date the app has been tested by service users with high levels of clinical paranoia, and all have wanted their name to be inputted onto the welcome screen.

## AUDIO RECORDING

The study will adhere to the joint guidance on secure audio recording issued by King's College London and South London and Maudsley (SLaM). Assessment and therapy sessions will be recorded, with consent, using encrypted smart phone devices and data will be transferred to secure central storage as soon as possible. When not in use, devices will be stored in a locked cabinet within a locked office. Each device will be password protected. In the event of the device being lost or stolen this will be reported as a data incident to the Information Management and Compliance Team at King's College London and the Information Governance Team at SLaM. Any sensitive data on a lost/stolen device will be remotely erased.

## 542 **20. Data Management**

543 All data is anonymised at source. A log of contacts with participants including address and other contact details  
544 will be kept separate from all the research data. Details necessary to contact participants, and for  
545 communication with teams will be stored as above. Data will be shared through CRN, potentially with other  
546 researchers working under their auspices.

547 No patient identifiable information is recorded on the research assessment records and the computerised  
548 database is held centrally and managed by the KCL Clinical Trials Unit. Data from the assessments are entered  
549 into this central record by research assistants using a secure network connection. Audiorecording equipment  
550 will be used to record assessments to check fidelity to assessment protocols and allow for multiple ratings of  
551 assessments to ensure interrater reliability. The therapy sessions will be audio recorded (with participant  
552 consent) for monitoring the intervention in terms of fidelity and competence. These audio files named with a  
553 unique participant identifier will be stored as computer files on secure NHS/ University servers.

554 All personal data will be kept in a locked filing cabinet in a locked office at the three trial sites and will be  
555 accessible only by researchers. Therapy files will be kept in a secure office in the clinic and are not accessible  
556 to the staff collecting the research outcome data. Audio recordings of the therapy are stored as described above,  
557 are accessible to the patient's trial therapist and to the senior research clinician supervising that therapist.

## 558 **21. Publication Policy**

559 It is intended that the results of the study will be reported and disseminated at international conferences and in  
560 peer-reviewed scientific journals and will be made available to participants and clinical teams in an accessible  
561 format.

## 562 **22. Insurance / Indemnity**

563 KCL insurance applies.

## 564 **23. Financial Aspects**

565 This trial is fully funded by the MRC/NIHR Efficacy and Mechanism Evaluation (EME) Programme.

566 **24. Signatures**

*PA Garety*

567

568 \_\_\_\_\_ 26.09.2016

569 Chief Investigator          Date

570 *Print name:* Professor Philippa Garety

571

572

573 \_\_\_\_\_

574 Statistician (if applicable) Date

575 *Print name*

576

577

578

579

580

581

582

583

584

585

586

587 **25. References**

- 588  
589 Andreasen, N.C. (1984). *The scale for the assessment of positive symptoms (SAPS)*. Iowa City, Iowa: The  
590 University of Iowa.  
591  
592 Beecham, J. (1995) Collecting and estimating costs. In M. Knapp: *The Economic Evaluation of Mental Health*  
593 *Care*. Aldershot: Arena.  
594  
595 Ben-Zeev D, Brenner CJ, Begale M et al. (2014) Feasibility, acceptability, and preliminary efficacy of a  
596 smartphone intervention for schizophrenia. *Schizophrenia Bull*, *40*, 1244–53.  
597  
598 Boutron I, Moher D, Altman DG, Schulz KF, Ravaud P, Grp C. (2008) Extending the CONSORT statement to  
599 randomized trials of nonpharmacologic treatment: explanation and elaboration. *Ann Intern Med*. *148*(4), 295–  
600 309.  
601  
602 Cheong JW, MacKinnon DP, & Khoo ST (2003) Investigation of mediational processes using parallel process  
603 latent growth curve modelling, *Structural Equation Modeling*, *10*, 238-62.  
604  
605 Design Council. (2005). Double Diamond Method. (2015, 10th June 2015). Retrieved from  
606 [http://www.designcouncil.org.uk/sites/default/files/asset/document/ElevenLessons\\_Design\\_Council%20\(2\).pdf](http://www.designcouncil.org.uk/sites/default/files/asset/document/ElevenLessons_Design_Council%20(2).pdf)  
607  
608  
609 Dudley, R., Taylor, P.J., Wickham, S., Hutton, P. (2015). Psychosis, delusions and the ‘jumping to  
610 conclusions’ reasoning bias: A systematic review and meta-analysis. *Schizophrenia*  
611 *Bulletin*, <http://dx.doi.org/10.1093/schbul/sbv150>  
612  
613 Dunn G., Emsley R., Liu H., Landau S., Green J., White I. & Pickles A. (2015) Evaluation and validation of  
614 social and psychological markers in randomised trials of complex interventions in mental health. *Health*  
615 *Technology Assessment*, *19* (93). doi: 10.3310/hta19930  
616  
617 Dunn, G. et al (2005). Estimating treatment effects from randomized clinical trials with noncompliance and  
618 loss to follow-up: the role of instrumental variable methods. *Statistical Methods in Medical Research*, *14*, 369-  
619 395.  
620  
621 Emsley R., Dunn G., & White IR. (2010). Mediation and moderation of treatment effects in randomised  
622 controlled trials of complex interventions. *Stat Methods Med Res* *19*, 237–70.  
623  
624 Freeman D. (2016). Persecutory delusions: a cognitive perspective on understanding and treatment, *The Lancet*  
625 *Psychiatry*, *3*(7), 685-692.  
626  
627 Freeman, D., Dunn, G., Garety, P., Weinman, J., Kuipers, E., Fowler, D., Jolley, S. & Bebbington, P. (2013).  
628 Patients’ beliefs about the causes, persistence and control of psychotic experiences predict take-up of effective  
629 cognitive behavior therapy for psychosis. *Psychological Medicine*, *43*(2), 269-277.  
630  
631 Freeman, D., Dunn, G., Startup, H., Pugh, K., Cordwell, J., Mander, H., . . . Kingdon, D. (2015). Effects of  
632 cognitive behaviour therapy for worry on persecutory delusions in patients with psychosis (WIT): a parallel,  
633 single-blind, randomised controlled trial with a mediation analysis. *Lancet Psychiatry*, *2*(4), 305-313.  
634  
635 Freeman, D., Garety, P. A., PE Bebbington, P. E. et al. (2005). Psychological investigation of the structure of  
636 paranoia in a non-clinical population, *Br J Psychiatry*, *186*, 427–435  
637  
638 Freeman, D., Garety, P.A., Fowler, D., Kuipers, E., Bebbington, P. E., Dunn, G. (2004). Why do people with  
639 delusions fail to choose more realistic explanations for their experiences? An empirical investigation. *Journal*  
640 *of Consulting and Clinical Psychology*, *72*, 671–680.  
641  
642 Fowler, D., Freeman, D., Smith, B., et al. (2006). The Brief Core Schema Scales (BCSS). Psychometric  
643 properties and associations with paranoia and grandiosity in non-clinical and psychosis samples. *Psychological*  
644 *Medicine*, *36*, 749-759.

645  
646  
647  
648  
649  
650  
651  
652  
653  
654  
655  
656  
657  
658  
659  
660  
661  
662  
663  
664  
665  
666  
667  
668  
669  
670  
671  
672  
673  
674  
675  
676  
677  
678  
679  
680  
681  
682  
683  
684  
  
685  
686  
687  
  
688  
689  
690  
691  
692  
693  
694  
695  
696  
697  
698  
699  
700  
701

Garety, P. A., Hemsley, D. R., & Wessely, S. (1991). Reasoning in deluded schizophrenic and paranoid patients: Biases in performance on a probabilistic inference task. *Journal of Nervous and Mental Disease*, *179*, 194-201.

Garety, P.A., Freeman, D., Jolley, S., Dunn, G., Bebbington, P.E., Fowler, D.G., Kuipers, E., Dudley, R. (2005). Reasoning, emotions and delusional conviction in psychosis. *Journal of Abnormal Psychology*, *114*, 373-384.

Garety P, Waller H., Emsley R, Jolley S., Kuipers E., Bebbington P., Dunn G., Fowler D., Hardy A. & Freeman D. (2014) Cognitive mechanisms of change in delusions: An experimental investigation targeting reasoning to effect change in paranoia. *Schizophrenia Bulletin*, *41* (2), 400-410. doi: 10.1093/schbul/sbu103

Garety, P. A., Kuipers, E., Fowler, D., Freeman, D., Bebbington, P. E. (2001). A cognitive model of the positive symptoms of psychosis. *Psychological Medicine*, *31*. 189-195.

Garety, P.A., Kuipers, E., Fowler, D., Freeman, D. & Bebbington, P.E. (2001). A cognitive model of the positive symptoms of psychosis. *Psychological Medicine*, *31*(2):189-195.

Garety, P. A., Fowler, D. G., Freeman, D., Bebbington, P., Dunn, G., & Kuipers, E. (2008). Cognitive-behavioural therapy and family intervention for relapse prevention and symptom reduction in psychosis: Randomised controlled trial. *British Journal of Psychiatry*, *192*, 412-423.

Garety, P. A. & Freeman, D. (1999). Cognitive approaches to delusions: A critical review of theories and evidence. *British Journal of Clinical Psychology*, *38*, 113-154.

Green, C. E., Freeman, D., Kuipers, E., Bebbington, P., Fowler, D., Dunn, G., Garety, P. A. (2008). Measuring ideas of persecution and social reference: The Green et al. Paranoid Thoughts Scales (GPTS). *Psychological Medicine*, *38*(1), 101-111.

Haddock, G., Eisner, E., Boone, C., Davies, G., Coogan, C., & Barrowclough, C. (2014). An investigation of the implementation of NICE-recommended CBT interventions for people with schizophrenia. *Journal of Mental Health*, *23*(4), 162-165.

Haddock, G., McCarron, J., Tarrier, N., & Faragher, E. B. (1999). Scales to measure dimensions of hallucinations and delusions: the psychotic symptom rating scales (PSYRATS). *Psychological Medicine*, *29*, 879-889.

Hooley J. M & Teasdale J. D. (1989) Predictors of relapse in unipolar depressives: expressed emotion, marital distress, and perceived criticism. *Journal of Abnormal Psychology*, *98*, 229-35.

Hollis, C., Morriss, R., Martin, J., Amani, S., Cotton, R., Denis, M. & Lewis, S. (2014). Technological innovations in mental healthcare: harnessing the digital revolution. *The British Journal of Psychiatry*, *206* (4), 263-265.

Kahneman, D. (2011). *Thinking, fast and slow*. New York, NY: Farrar, Straus and Giroux; US.

Kilpatrick, B., Strauss, G.P., Nyugyen, L., Fischer, B.F., Daniel, D.C., Cienfuegos, S., Marder, S. R. (2011). The Brief Negative Symptom Scale: psychometric properties. *Schizophrenia Bulletin*, *37*, 300-305.

Lezak MD, Howieson DB, Loring DW. *Neuropsychological Assessment*. 4th ed. New York: Oxford University Press; 2004.

Linden, M. (2013). How to define, find and classify side effects in psychotherapy: From unwanted events to adverse treatment reactions. *Clinical Psychology and Psychotherapy*, *20*, 286-296.

Little, R.J.A. & Rubin, D.B (2002). *Statistical Analysis with Missing Data* (2nd Ed.). Wiley, Chichester & New York.

702 Marcus, E., Garety, P., Weinman, J., Emsley, R., Dunn, G., Bebbington, P. *et al.* (2014). A pilot validation of a  
703 modified Illness Perceptions Questionnaire designed to predict response to cognitive therapy for psychosis.  
704 *Journal of Behavior Therapy & Experimental Psychiatry*, 45, 459-466.  
705  
706 MacKinnon DP (2008). *Statistical Mediation Analysis*. New York: Lawrence Erlbaum Associates.  
707  
708 McLean, B. F., Matisse, J. K. Balzan, R. P. (2016). Association of the Jumping to Conclusions and Evidence  
709 Integration Biases With Delusions in Psychosis: A Detailed Meta-analysis, *Schizophrenia Bulletin*, 11,  
710 *Schizophrenia Bulletin Advance Access* published May 11, 2016  
711  
712 Meyer TJ, Miller ML, Metzger RL, Borkovec TD (1990). Development and validation of the Penn State Worry  
713 Questionnaire. *Beh Research and Therapy*, 28, 487-495.  
714  
715 National Institute for Health and Care Excellence. Psychosis and schizophrenia: treatment and management.  
716 (Clinical guideline 178.) 2014. <http://guidance.nice.org.uk/CG178>.  
717  
718 Priebe, S., Huxley, P., Knight, S. & Evans, S. (1999) Application and results of the Manchester Short  
719 Assessment of Quality of Life (MANSA). *International Journal of Social Psychiatry*, 45, 7–12.  
720  
721 Ross, K., Freeman, D., Dunn, G. and Garety, P. (2009). A randomised experimental investigation of reasoning  
722 training for people with delusions. *Schizophrenia Bulletin*, 37, 324-333.  
723  
724 So, S. H., Freeman, D., Dunn, G., Kapur, S., Kuipers, E., Bebbington, P., Fowler, D., Garety, P. (2012).  
725 Jumping to Conclusions, a Lack of Belief Flexibility and Delusional Conviction in Psychosis: A Longitudinal  
726 Investigation of the Structure, Frequency, and Relatedness of Reasoning Biases. *Journal of Abnormal*  
727 *Psychology*, 121(1), 129-139.  
728  
729 Tennant, R., Hiller, L., Fishwick, R., Platt, S., Joseph, S., Weich, S., Parkinson, J., Secker, J., Stewart-Brown,  
730 S. (2007). The Warwick-Edinburgh Mental Well-being Scale (WEMWBS): development and UK validation,  
731 *Health and Quality of Life Outcomes*, 5(63).  
732  
733 van der Gaag M., Valmaggia L. R & Smit F. (2014) The effects of individually tailored formulation-based  
734 cognitive behavioural therapy in auditory hallucinations and delusions: a meta-analysis. *Schizophrenia*  
735 *Research*, 156 (1), 30-7. doi: 10.1016/j.schres.2014.03.016  
736  
737 Waller, H., Freeman, D., Jolley, S. & Garety, P. (2011). Targeting reasoning biases in delusions: A pilot study  
738 of the Maudsley Review Training Programme for individuals with persistent, high conviction delusions.  
739 *Journal of Behaviour Therapy and Experimental Psychiatry*, 42, 414-421.  
740  
741 Waller H., Emsley R., Freeman D., Bebbington P., Dunn G., Fowler D., Hardy A., Kuipers E. & Garety P.  
742 Thinking Well: A randomised controlled feasibility study of a new CBT therapy targeting reasoning biases in  
743 people with distressing persecutory delusional beliefs. *Journal of Behavior Therapy and Experimental*  
744 *Psychiatry*, 2015; 48: 82-9. doi: 10.1016/j.jbtep  
745  
746 Wessely, S., Buchanan, A., Reed, A., Cutting, J., Evertitt, B., Garety, P., & Taylor, P. J. (1993). Acting on  
747 delusions: I. Prevalence. *British Journal of Psychiatry*, 163, 69-76.  
748  
749 Wechsler D. Wechsler Adult Intelligence Scale–Fourth Edition. Pearson; San Antonio, TX: 2008.  
750  
751 World Health Organisation (2010). *International Classification of Diseases 10<sup>th</sup> Revision* (2010).  
752

## 753 26. Appendixes

754

**Appendix 1: SlowMo Trial  
Design and Recruitment Flowchart**

755  
756  
757  
758  
759  
760  
761  
762  
763  
764  
765

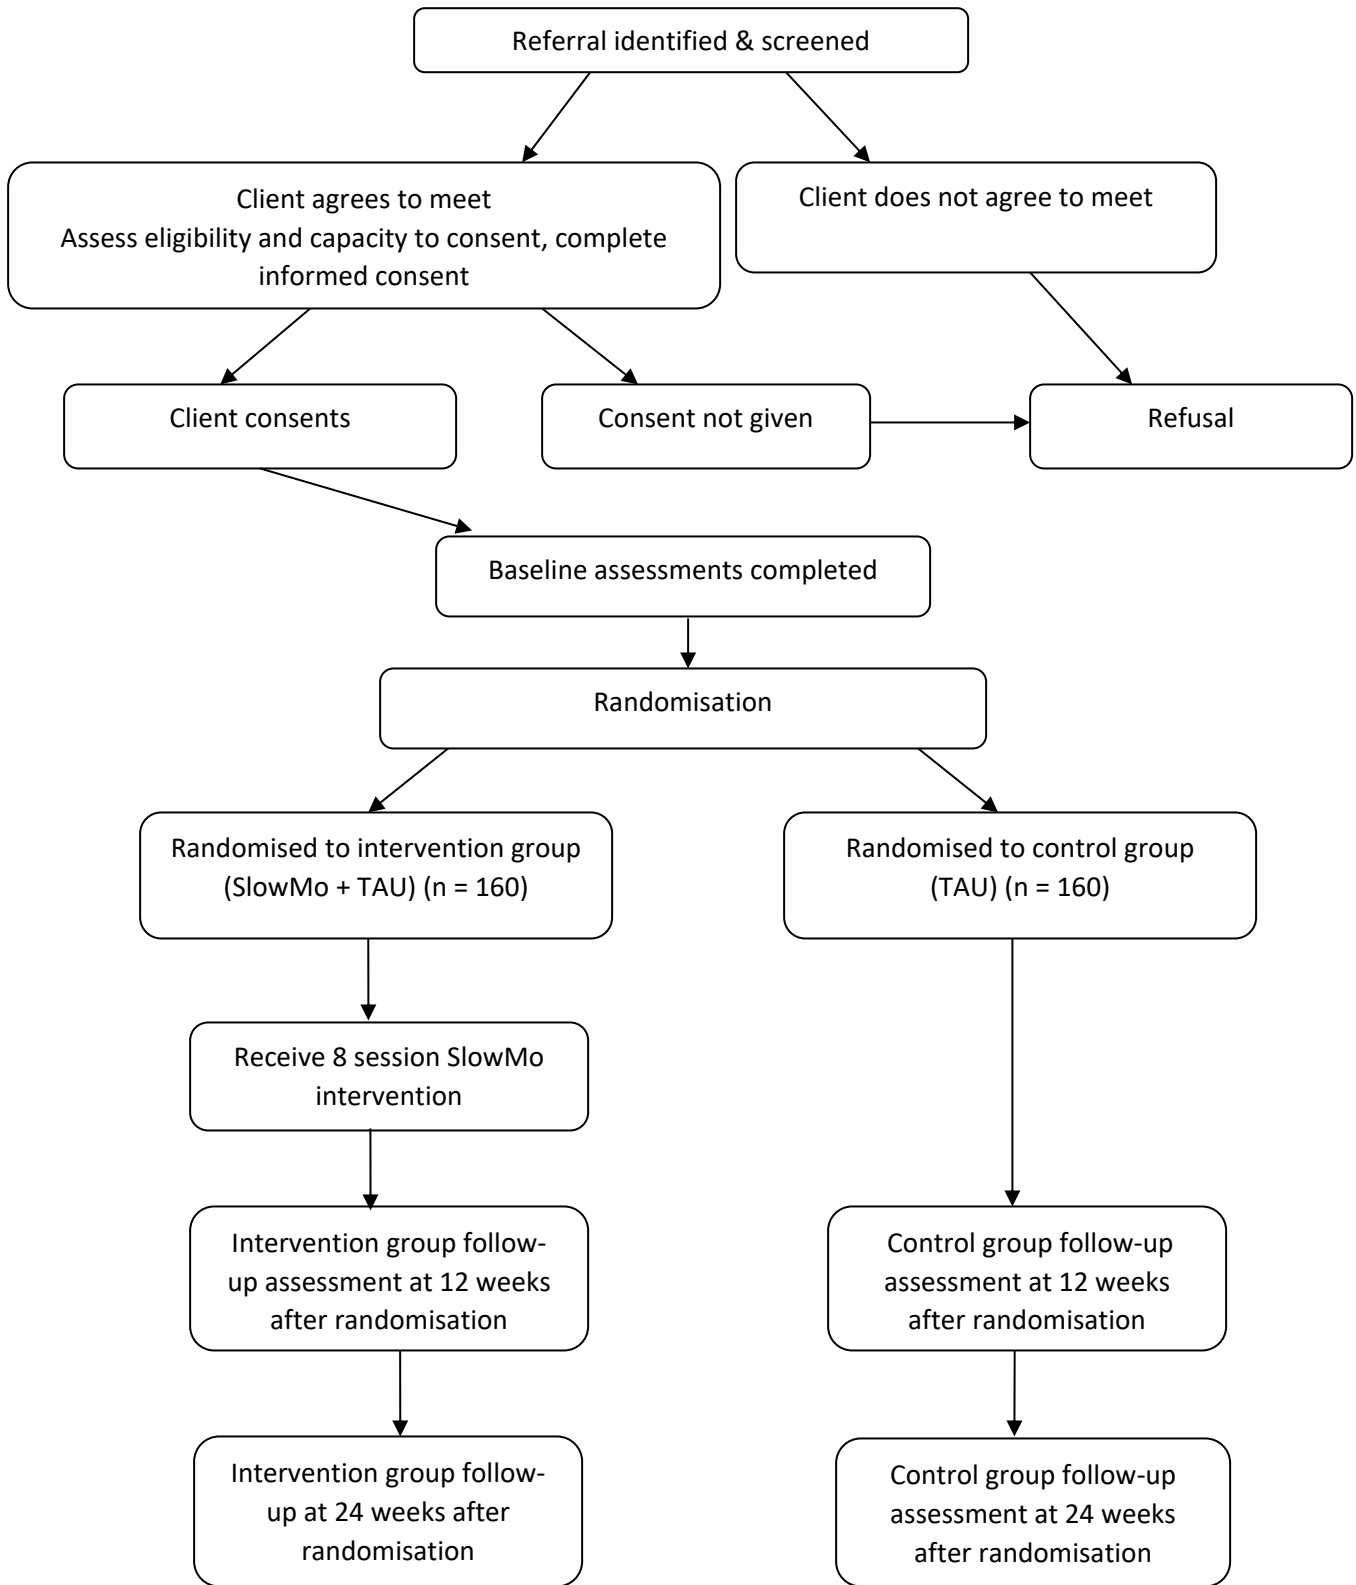

766 **2. Statistical Analysis Plan (SAP)**

767 **Version:** 1.2

768 **Authors:** Richard Emsley

769 **Date:** 20/12/2019

770 **Protocol version:** This SAP has been written based on Protocol V1.2

771 **Trial registration:** Current Controlled Trials ISRCTN32448671, registration date: 02/02/17.

772 **Version history:**

| Version: | Date:      | Changes:                                                           |
|----------|------------|--------------------------------------------------------------------|
| 1.2      | 20/12/19   | Updated to include new version of GPTS based on Freeman et al 2019 |
| 1.1      | 27/11/2017 | Incorporating comments from Investigator team                      |
| 1.0      | 10/07/2017 | First draft of SAP                                                 |

773 **Chief Investigator: Professor Philippa Garety**



Date 28/01/20

774

Signature..

**Trial Statisticians: Professor Richard Emsley**

Signature

Date 20/12/2019

**Trial Steering Group Chair: Professor Richard Bentall**

775

776



Signature.....

. Date . Feb 2<sup>nd</sup> 2020

779 **DMEC Statistician: Professor John Norrie**



Signature.....780

Date 29/1/2020



782 **Contents**

|     |    |                                                                    |    |
|-----|----|--------------------------------------------------------------------|----|
| 783 | 1. | Quantitative Analysis Plan .....                                   | 4  |
| 784 | 2. | Research objectives and hypotheses .....                           | 5  |
| 785 | a. | Research questions .....                                           | 5  |
| 786 | b. | Hypothesis .....                                                   | 5  |
| 787 | 3. | Brief description of the trial .....                               | 6  |
| 788 | a. | Trial design.....                                                  | 6  |
| 789 | b. | Randomisation procedure, allocation concealment and blinding ..... | 6  |
| 790 | c. | Eligibility screening .....                                        | 6  |
| 791 | 4. | Outcome measures .....                                             | 7  |
| 792 | a. | Primary outcome .....                                              | 7  |
| 793 | b. | Secondary outcomes .....                                           | 7  |
| 794 | c. | Timing of outcome measurements .....                               | 11 |
| 795 | 5. | Sample size and power calculations .....                           | 11 |
| 796 | 6. | Data analysis - Data description.....                              | 13 |
| 797 | 7. | Statistical methods for inferential analysis .....                 |    |
| 798 | 13 |                                                                    |    |
| 799 | a. | Primary outcomes .....                                             | 14 |
| 800 | b. | Secondary outcomes .....                                           | 14 |
| 801 | c. | Mediation analysis.....                                            | 14 |
| 802 | d. | Missing data.....                                                  | 14 |
| 803 | 8. | Database and data entry checks .....                               |    |
| 804 | 15 |                                                                    |    |

805 **1. Quantitative Analysis Plan**

806 This document details the presentation and analysis strategy for the primary papers reporting  
807 results from the SlowMo trial. It is intended that the results reported in these papers will follow the strategy set  
808 out herein; subsequent papers of a more exploratory nature will not be bound by this analysis plan but will be  
809 expected to follow the broad principles laid down for the primary paper(s). The principles are not intended to  
810 curtail exploratory analysis or to prohibit sensible statistical and reporting practices but they are intended to  
811 establish the strategy that will be followed as closely as possible in analysing and reporting the trial. Reference  
812 was made to the trial protocol version 1.2 (dated 25/09/2018). A published protocol is available in (Garety et  
813 al, 2017, *Trials* 18:510.10.1186/s13063-017-2242-7), ICH guidelines on Statistical Principles (ICH E9 (1998))  
814 reference and CONSORT SPI guidelines (Grant et al, 2018).

815 **Investigators:** Prof Philippa Garety, Prof Daniel Freeman, Prof David Fowler, Prof Richard Emsley,  
816 Prof Graham Dunn, Prof Elizabeth Kuipers, Prof Paul Bebbington, Prof Kathryn Greenwood, Dr Amy Hardy.

817 **PI:** Prof Philippa Garety

818 **Trial Manager:** Dr Tom Ward

819 **Trial Statisticians:** Prof Richard Emsley, Prof Graham Dunn

820 **2. Research objectives and hypotheses**

821 **a. Research questions**

- 822 • Is SlowMo efficacious in reducing paranoia severity over 24 weeks, when added to treatment as usual  
823 (TAU) in comparison to TAU alone?  
824 • Does SlowMo reduce paranoia severity by modifying fast thinking (reducing belief inflexibility and  
825 jumping to conclusions)?  
826 • Do participant characteristics (i.e. their cognitive capacities, specifically working memory and thinking  
827 habits; and negative symptoms) moderate the effects of the intervention?  
828 • Does outcome differ by adherence to the intervention, and is adherence predicted by beliefs about illness  
829 and about the intervention?  
830 • Does the SlowMo digital therapy platform have acceptable rates of usability, acceptability and  
831 adherence?  
832 • Does SlowMo lead to changes in the following secondary outcomes: other delusional symptoms,  
833 wellbeing, quality of life, self and others schemas, service use and worry?

834 **b. Hypothesis**

835 Primary hypotheses:

- 836 1. The intervention will reduce paranoia severity over 24 weeks  
837 2. Fast thinking (belief inflexibility and jumping to conclusions) will improve in response to the  
838 Intervention  
839 3. Reductions in fast thinking will mediate improvement in paranoia severity

840 Secondary hypotheses:

- 841 • Poorer working memory and more severe negative symptoms will negatively moderate treatment effects  
842 • Therapy adherence will moderate the effects of treatment on outcome and adherence will be predicted by  
843 beliefs about mental health problems  
844 • Worry will not mediate reductions in paranoia severity

845 **3. Brief description of the trial**

846 **a. Trial design**

847 Parallel-group randomised controlled trial, with 1:1 allocation and blinded assessors, to test the efficacy of the  
848 SlowMo intervention in reducing paranoia severity when added to Treatment As Usual (TAU), compared with  
849 TAU.

850 **b. Randomisation procedure, allocation concealment and blinding**

851 Randomisation will take place via a web-based service hosted at the King's Clinical Trial Unit  
852 (KCTU). This can be accessed at [www.ctu.co.uk](http://www.ctu.co.uk) by clicking 'randomisation - advanced' on the lower right  
853 hand side of the page. This system can only be accessed by trial staff who are trained and have previously been  
854 allocated a username and password. Requests for passwords are via the trial manager to the KCTU.

855 Independent randomisation will use an online system generating randomly varying permuted blocks, stratified  
856 by site and baseline paranoia severity. Stratification by paranoia severity will use a  
857 median split of >62 (Green Paranoid Thoughts Scale (GPTS) Part B).

858 Research workers will be blind to therapy allocation in order to facilitate completion of unbiased and objective  
859 assessments. Adherence to the blindness procedure will be supported by the research co-ordinator and  
860 therapists having responsibility for the randomisation process and for informing participants of randomisation  
861 outcome. Further, the blinding procedure will be explained to participants, who will be reminded not to inform  
862 research workers of therapy allocation. Breaks in blinding will be monitored and recorded.

863 **c. Eligibility screening**

864 Inclusion criteria:

- 865 • Aged 18 years and over;
- 866 • Persistent (3+ months) distressing paranoia (as assessed using the Schedules for Clinical Assessment  
867 in Neuropsychiatry (SCAN) and scoring >29 on the GPTS, Part B; persecutory subscale);
- 868 • Diagnosis of schizophrenia-spectrum psychosis (F20-29, ICD-10);
- 869 • Capacity to provide informed consent;
- 870 • Sufficient grasp of English to participate in informed consent process, assessments and interventions.

871 Exclusion criteria:

- 872 • Profound visual and/ or hearing impairment;
- 873 • Inability to engage in the assessment procedure;
- 874 • Currently in receipt of other psychological therapy for paranoia;
- 875 • Primary diagnosis of substance abuse disorder, personality disorder, organic syndrome or learning  
876 disability.

877 **4. Outcome measures a.**

878 **Primary outcome**

879 The primary outcome is paranoia severity measured by the GPTS over 24 weeks using both total  
880 score and subscale scores. The GPTS comprises two scales assessing thinking relevant to paranoia: ideas of  
881 social reference and persecution, rated over the preceding month. Each item is scored on a five-point Likert  
882 scale from 1 ('not at all') to 5 ('totally'). A total score can be calculated ranging from 32 to 160, with higher  
883 scores reflecting higher levels of paranoia. Two 16-item subscales assess ideas of social reference (Part A) and  
884 persecution (Part B) relevant to paranoia.

885 **b. Other paranoia outcomes (as secondary outcomes)**

- 886 • The Psychotic Symptom Rating Scales-Delusions (PSYRATS-Delusions), consisting of six items  
887 assessing the following dimensions of delusions: amount of preoccupation with delusions, duration of  
888 preoccupation with delusions, conviction, amount of distress, intensity of distress, and disruption to  
889 life caused by beliefs. Outcomes will be reported as total scores, as well as the two factors reported by  
890 Steel et al (2007): Factor 1  
891 Preoccupation and Conviction; Factor 2 Distress.

- 892 • The persecutory delusions and ideas of reference items from the Scales for Assessment of Positive  
893 Symptoms (SAPS; Andreasen, 1984), a semi-structured interview designed to assess the positive  
894 symptoms of psychosis.
- 895 • The Revised-GPTS over 24 weeks using both total scores and subscale scores. The R-GPTS (Freeman et  
896 al, 2019) comprises two scales assessing thinking relevant to paranoia based on items from the  
897 original scale: ideas of social reference (8-items) and persecution (10- items), rated over the preceding  
898 month. Each item is scored on a five-point Likert scale  
899 from 0 ('not at all') to 4 ('totally'). A total score can be calculated ranging from 0 to 72, with higher  
900 scores reflecting higher levels of paranoia.

901 **c. Mediators (as secondary outcomes)**

- 902 Hypothesised mediators are measured by changes in fast thinking and slow thinking assessed by:
- 903 • Possibility of Being Mistaken (taken from the Maudsley Assessment of Delusions Schedule (MADS)); a  
904 binary measure (presence/ absence of flexibility) will be reported, together with self-reported %  
905 conviction in the 'possibility of being mistaken'.
- 906 • Alternative Explanations from the Explanations of Experiences interview. A binary measure (presence/  
907 absence of alternative explanations) will be reported, as well as the number of alternative explanations
- 908 • Jumping to Conclusions (JTC) Beads data-gathering task versions 85:15 and 60:40 A binary score will  
909 be constructed for presence (defined as fewer than 3 beads) JTC/ absence of JTC, as well as the  
910 number of beads drawn.

911 In addition to the above, we will report the level of conviction about the jar chosen in the beads  
912 gathering task (rated using a visual analogue scale from 0-100), together with the levels of  
913 endorsement (VAS 0-100) of rational reasoning (I took my time to think it through) and experiential reasoning  
914 (I chose based on a gut-feeling or hunch) to choose jar.

- 915 • The Fast and Slow Thinking Scale (FAST; Hardy et al. and previously named the TAPS) is a self-report  
916 questionnaire assessing dual-process reasoning in the context of paranoia. It comprises 10 statements  
917 rated on a 5-point scale (1 = not at all, 5 totally). There are two subscales, one assessing fast  
918 (intuitive) thinking and one measuring slow (analytic) thinking. Each subscale consists of 5 items,  
919 with higher scores reflecting greater  
920 endorsement of that reasoning style.

921 **d. Other problems and processes (secondary outcomes)**

- 922 • The Penn State Worry Questionnaire (PSWQ; Meyer et al., 1990) is a 16-item self-report measure of  
923 worry, with high internal consistency and good test-retest reliability (Meyer et al., 1990; Fresco et al.,  
924 2003). It uses a 5-point rating scale (1 = not at all typical of me, 5 = very typical of me) to assess  
925 worry. The total score is the sum of all responses; ranging from 16 to 80. Items 1, 3, 8, 11 are reverse-  
926 scored.
- 927 • The Brief Core Schema Scales (BCSS) is a self-report assessment of schemata concerning self and others  
928 in psychosis. It uses a 5-point scale (0 = do not believe it, 4 = believe it totally) and assesses four  
929 dimensions (each comprising 6 items) of self and other evaluation: negative-self, positive-self,  
930 negative-other, positive-other.
- 931 • The Warwick-Edinburgh Mental Wellbeing Scale (WEMWBS) comprises 14-items, designed to measure  
932 mental wellbeing over the last 2 weeks with a focus on positive aspects of mental health including  
933 positive affect (feelings of optimism, cheerfulness, relaxation), satisfying interpersonal relationships,  
934 and positive functioning (energy, clear thinking, selfacceptance, personal development, competence  
935 and autonomy). All items are positively worded, and are rated on a 5-point Likert scale ranging from 1  
936 ('none of the time') to 5 ('all of the time'). Total scores ranges from 14 to 70, with higher scores  
937 indicating higher levels of well-being.
- 938 • The Manchester Short Assessment of Quality of Life (MANSA) is a 25-item measure assessing quality  
939 of life. The first Section (9 items) assesses demographic details (age at leaving full-time education,

940 employment status; kind of occupation; working hours per week; monthly income; state benefits;  
 941 number of children; people the patient lives with; and type of residence). N.B we collect demographic  
 942 information at the start of the  
 943 assessment and will not report these items separately. Four subjective items assess the existence of a  
 944 "close friend", whether a friend has been seen over the last week, whether the person has been  
 945 accused of a crime (past year), and whether they have been the victim of physical violence (past year);  
 946 these are answered dichotomously (yes or no) and  
 947 summarised individually. Twelve subjective items assess satisfaction: with life as a whole, job,  
 948 financial situation, number and quality of relationships, leisure activities, accommodation, personal  
 949 safety, the people the patient lives with, sex life, family relationships, physical health, and mental  
 950 health. These twelve satisfaction items are rated on a 7-point Likert scale ranging from 1 ('couldn't be  
 951 worse') to 7 ('couldn't be better'). Total scores thus range from 12 to 84, with higher scores reflecting a  
 952 better quality of life.

953 • Service Use is assessed by the Client Service Receipt Inventory (CSRI). We will report data in four  
 954 domains (all over the last 6 months): Contact with professionals, Day service use, Home Treatment/  
 955 Crisis team involvement, Hospital Admission.

956 **e. Adverse events**

957 The occurrence of adverse events (AEs) will be monitored actively and systematically, following CONSORT  
 958 guidance for reporting harms. AEs include: deaths; self-harm; serious violent incidents; complaints about  
 959 therapy; and referrals to crisis care or admission to psychiatric hospital during  
 960 therapy. A standard method of reporting will be employed, categorising events by severity (five  
 961 grades, A-E). Subject to approval by the independent chairperson of the Data Monitoring and Ethics  
 962 Committee, investigators will also determine whether an event is temporally related to the  
 963 intervention, and whether it is unexpected or unexplained given the participant's clinical course,  
 964 previous condition and history, and concomitant treatments. The event will then be rated in five  
 965 categories from 'not related' to 'related'. Any associations between AEs and the SlowMo hardware  
 966 or software will also be recorded.

967 **f. Other measures (assessed at baseline only; potential moderators)**

968 • Scales for Assessment of Positive Symptoms: a semi-structured interview assessing positive  
 969 symptoms of psychosis in four domains: hallucinations, delusions, bizarre behaviour and positive formal  
 970 thought disorder. Within the 4 domains a 6-point Likert scale is used to assess the severity of individual  
 971 symptoms from '0' ("none") to '5' ("severe"). A scale total score is calculated by summing all individual items.

972 • Brief Negative Symptom Scale: a semi-structured interview designed to assess negative symptoms of  
 973 psychosis. It comprises 13 items distributed over six domains: i) Anhedonia (Intensity and Frequency of  
 974 pleasure (current activities); Intensity of expected pleasure for future activities); ii) Lack of normal distress  
 975 (one item); iii) Asociality (Behaviour, Internal experience); iv) Avolition (Behaviour, Internal Experience); v)  
 976 Blunted affect (Facial Expression, Vocal Expression, Expressive Gestures); and vi) Alogia (Quantity of speech  
 977 and spontaneous elaboration). (The distress subscale has only one item). A likert scale ranging from absent (0)  
 978 to severe (6) is used to assess the severity of each item. These individual scores are summed to provide a total  
 979 score for the scale ranging from 0 to 78. Subscale scores are calculated by summing the individual items within  
 980 each subscale.

981 • Beliefs about Problem Questionnaire: a 14-item self-report questionnaire designed to assess illness  
 982 perceptions, including secondary appraisals of the nature, cause, duration, consequences and management of  
 983 illness/problems. Each item is rated on a five-point likert scale in opinion format: Strongly agree=5, Agree= 4,  
 984 Neither agree nor disagree= 3, Disagree= 2, Strongly Disagree=1. Items 5, 7 and 8 are reverse scored. Higher  
 985 scores represent higher levels of cure-control, greater optimism and expectation of change, endorsement of  
 986 psychological causes etc.)

987 • Letter Number Sequencing Test: A cognitive task which assesses working memory and involves  
 988 sequencing, mental manipulation, attention, short-term auditory memory, visuospatial imaging and processing  
 989 speed. In the task the participant is read a sequence of letter and numbers, and recalling the numbers in  
 990 ascending order and letters in alphabetical order. The number is recalled first, followed by the letter, for

991 example, 3-W-5 would be 3-5-W and 1-J-A would be 1-A-J. The LNS includes a set of practice items, where  
992 corrections and repetitions can be made for errors in understanding the instructions. In the test phase of the  
993 LNS, instructions and items are not re-read to participants or corrected. Participants are deemed to have failed a  
994 test if they miss all 3 trials of an item. The task comprises 7 items, with 3 trials per item yielding an overall  
995 maximum raw score of 21 which is then converted into an age-adjusted Scaled Score.

- 996
- 997
- 998
- 999
- 1000
- 1001
- 1002
- 1003
- 1004
- 1005
- 1006
- Trail Making Test: The Trail Making Test (TMT; Lezak, 2004) is an accessible and widely used neuropsychological instrument assessing a range of cognitive skills, such as visual attention, task switching, shifting cognitive set, psychomotor speed, abstraction, mental flexibility and executive function (Tombaugh, 2004; Salthouse, 2011). The TMT consists of two conditions: A and B, both requiring participants to draw lines sequentially connecting 25 numbers or letters as quickly as possible. In condition A, participants draw lines connecting circled numbers (1 - 25) in a numerical sequence, as fast as possible. In condition B, participants circle both numbers (1 - 13) and letters (A - L) in an alternating numerical and alphabetic sequence, as quickly as possible (e.g., 1-A-2-B-3-C-4-D-5). In both parts, participants are required to connect the set of circles as quickly and accurately as possible, without lifting the pen or pencil from the paper. Time taken in Task A and B will be reported.
- 1007
- Perception of Carer Criticism. A single self-reported item adapted from Tooley et al (1989). This assesses the person's perception of criticism from a carer (where one is identified) over the previous month (How critical do you feel this person has been of you in the past month?). Scores range from 0 (not at all) to 5 (extremely).
- 1008
- 1009
- 1010

1011 **g. Acceptability and adherence (in SlowMo therapy arm only)**

1012 The accessibility and usability of the therapy and the digital platform will be evaluated, along with adherence.

1013 Usability and acceptability of the digital platform will be assessed by the User Experience Survey, which

1014 consists of 12 items rated from 0 to 10 that comprise 3, 4-item subscales for enjoyment, ease-of-use and

1015 usefulness. This will be completed with therapist at the end of therapy.

1016 Adherence to individual sessions will be assessed by number and duration of sessions attended, while the

1017 fidelity of therapy to the treatment manual will be assessed by the SlowMo therapy fidelity checklist

1018 completed by therapists at the end of each session. This will involve a) rating (dichotomous) on whether key

1019 webapp app **content** was delivered in each session and b) extent to which key SlowMo therapeutic **processes**

1020 were facilitated as per therapy manual (items vary by session with individual scoring ranging from 0=not at

1021 all; 1= partially; 2= totally). Adherence to the mobile app will be operationalised as at least one interaction

1022 with home-screen occurring outside of sessions for a minimum of three of the therapy sessions.



1023 **5. Timing of outcome measurements**

1024 **A digital therapy for people who fear harm from others (SlowMo) STUDY PERIOD**

|                                                                                                      | <b>Enrolment</b>                | <b>Allocation</b>                            | <b>Post-allocation</b> |                 | <b>Follow up</b> |
|------------------------------------------------------------------------------------------------------|---------------------------------|----------------------------------------------|------------------------|-----------------|------------------|
| <b>TIME POINT</b>                                                                                    | <i>Completed within 4 weeks</i> | <i>Within two weeks of baseline, 0 weeks</i> | <i>0-12 weeks</i>      | <i>12-weeks</i> | <i>24-weeks</i>  |
| <b>ENROLMENT: Routine eligibility screen</b>                                                         | X                               |                                              |                        |                 |                  |
| <b>Informed consent</b>                                                                              | X                               |                                              |                        |                 |                  |
| <b>Allocation</b>                                                                                    |                                 | X                                            |                        |                 |                  |
| <b>INTERVENTIONS: SlowMo+TAU</b>                                                                     |                                 |                                              | X                      |                 |                  |
| <b>Treatment as usual (TAU)</b>                                                                      |                                 |                                              | X                      |                 |                  |
| <b>ASSESSMENTS: Primary outcome:</b>                                                                 |                                 |                                              |                        |                 |                  |
| <i>Paranoia severity<br/>(Green Paranoid Thoughts Scale, total, scale A and B)</i>                   | X                               |                                              |                        | X               | X                |
| <b>Other paranoia outcomes:</b>                                                                      |                                 |                                              |                        |                 |                  |
| <i>The Psychotic Symptoms Rating Scales- delusions</i>                                               | X                               |                                              |                        | X               | X                |
| <i>Delusions of persecution and reference items<br/>( Scales for Assessment of Positive Symptoms</i> | X                               |                                              |                        | X               | X                |
| <b>Hypothesised mediators:</b>                                                                       |                                 |                                              |                        |                 |                  |
| <i>Possibility of being mistaken<br/>(Maudsley Assessment of Delusions Schedule</i>                  | X                               |                                              |                        | X               | X                |
| <i>Alternative Explanations (Explanations for Experiences</i>                                        | X                               |                                              |                        | X               | X                |
| <i>Jumping to Conclusions Reasoning</i>                                                              | X                               |                                              |                        | X               | X                |
| <b>Other problems and processes:</b>                                                                 |                                 |                                              |                        |                 |                  |
| <i>Scales for Assessment of Positive Symptoms</i>                                                    | X                               |                                              |                        |                 |                  |

|                                                           |   |  |  |   |   |
|-----------------------------------------------------------|---|--|--|---|---|
| <i>Brief Negative Symptom Scale</i>                       | X |  |  |   |   |
| <i>Beliefs about Problem Questionnaire</i>                | X |  |  |   |   |
| <i>Letter Number Sequencing Test</i>                      | X |  |  |   |   |
| <i>Trail Making Test</i>                                  | X |  |  |   |   |
| <i>Fast and Slow Thinking (FAST, formally TAPS)</i>       | X |  |  | X | X |
| <i>Penn State Worry Questionnaire</i>                     | X |  |  | X | X |
| <i>Brief Core Schema Scales</i>                           | X |  |  | X | X |
| <i>Perception of Carer Criticism</i>                      | X |  |  |   |   |
| <i>The Warwick-Edinburgh Mental Wellbeing Scale</i>       | X |  |  | X | X |
| <i>The Manchester Short Assessment of Quality of Life</i> | X |  |  | X | X |
| <i>Client Service Receipt Inventory</i>                   | X |  |  |   | X |

**1027 6. Sample size and power calculations**

1028 Our required sample size is N=300, based on the following considerations. We powered the study  
1029 conservatively to detect a clinically meaningful 10-point reduction in the primary outcome measure (GTPS).  
1030 Based on a standard deviation of 25, this is a 0.4 effect size. We account for: clustering in the SlowMo arm  
1031 with an ICC=0.01 with 10 therapists (there is no clustering in the TAU arm), 1:1 allocation, 0.05 significance  
1032 level. Calculations were made using Clsamps in Stata. A simple twotailed t-test with 150 people per group  
1033 gives 90% power to detect an effect size of 0.4, and 80% for 0.35. In practice, power will be increased by using  
1034 multiple regression. In order to allow for a conservatively high 20% attrition, we will recruit 360 patients at  
1035 baseline, split equally between 3 sites (120 per site, 60 per arm per site). For the mediation analyses, a sample  
1036 of N=300 has >80% power to detect a proportion mediated of 40%, and >70% power to detect a proportion  
1037 mediated of 30%, corresponding to findings in our pilot work (calculated using PowerMediation in R).

**1038 7. Data summary and reporting**

1039 We will report data in line with the Consolidated Standards of Reporting Trials (CONSORT) 2018 Statement  
1040 for Social and Psychological Interventions showing attrition rates and loss to follow-up (see Figure 1). All  
1041 analyses will be carried out using the intention to treat principle, incorporating data from all participants  
1042 including those who do not complete therapy. Every effort will be made to follow up all participants in both  
1043 arms for research assessments.

1044 This statistical analysis plan will be agreed with a Data Monitoring and Ethics Committee before any  
1045 inspection of post-randomisation data by the research team. No interim analysis is planned.

1046 Analysis will be conducted in Stata version 15 or later. Descriptive statistics within each randomised group will  
1047 be presented for baseline values. These will include counts and percentages for binary and categorical  
1048 variables, and means and standard deviations, or medians with lower and upper quartiles, for continuous  
1049 variables, along with minimum and maximum values and counts of missing values. There will be no tests of  
1050 statistical significance or confidence intervals for differences between randomised groups on any baseline  
1051 variable.

1052 Descriptive statistics will be used to summarize assessments of feasibility and acceptability in terms of  
1053 recruitment, drop-out and completeness of therapy.

1054 Outcomes at 12 and 24 weeks will be presented separately for each group and summarised using counts and  
1055 percentages for binary and categorical variables, and means and standard deviations for continuous variables,  
1056 along with counts of missing values.

1057 The number of serious adverse events and adverse events will be presented as the number of events and  
1058 number of individuals with events. These will be provided separately for each randomised group and according  
1059 to the treatment received.

1060 **8. Statistical methods for inferential analysis a.**

1061 **Primary outcome**

1062 To test the primary hypothesis that the intervention will reduce paranoia severity over 24 weeks, we will fit a  
 1063 linear mixed model allowing for clustering by both participants and therapists to the repeated measures of  
 1064 GPTS. The model will include as fixed effects: randomised arm, time, time by randomised arm interaction,  
 1065 treatment site, baseline paranoia severity and the corresponding baseline assessment for the outcome under  
 1066 investigation. The treatment effect (between-group difference) will be extracted from the model for each time  
 1067 point. The model will include a random intercept for therapist in the intervention arm, with participants in the  
 1068 control arm considered as clusters of size 1. The use of a mixed effect models will allow for estimation of the  
 1069 intra-cluster correlation coefficient, a measure of the proportion of variance in outcome because of therapist  
 1070 effects.

1071 **b. Secondary outcomes**

1072 All secondary outcome measures (including putative mediators) will be analysed using the same modelling  
 1073 approach, using linear mixed models for continuous outcomes, and logistic mixed models for binary outcomes.

1074 **c. Moderation**

1075 The putative moderators will be tested separately by extending the mixed models by including as fixed effects  
 1076 the moderator, an interaction between moderator and treatment, and an interaction between moderator, time  
 1077 and treatment. The estimated coefficients from these will be used to assess if the treatment effects vary across  
 1078 levels of the moderator.

1079 **d. Mediation analysis**

1080 The trial outcomes will comprise two parallel series of longitudinal data: one for the putative mediators (M)  
 1081 and one for the clinical outcomes (Y). If we separately demonstrate a treatment effect on both the putative  
 1082 mediators and on the clinical outcomes, we will evaluate mediation in these parallel longitudinal data sets  
 1083 through the use of parallel growth curve and latent change  
 1084 models. These models preserve the basic mediation model by replacing observed variables with  
 1085 latent constructs - the growth factors driving the temporal responses, M1 to Mp and Y1 to Yp. Importantly the  
 1086 mediational structure only applies to the slope growth or change factors, since randomised treatments are  
 1087 independent of the intercept growth factors (baseline values).

1088 Growth curve and latent change models will be estimated by maximum likelihood and other methods using  
 1089 Stata or latent variable modelling package Mplus. The aim of these analyses is to demonstrate that the effect of  
 1090 treatment on the growth (change) in the clinical outcome (Y) is explained (caused) by its effect on the growth  
 1091 (change) in the mediator. The major challenge to a valid inference is that there may be confounding of the  
 1092 mediator and outcome. We will begin by allowing for baseline values of the mediator and of the clinical  
 1093 outcome, as in the analyses of the successful EME Worry Intervention Trial. We will then check the sensitivity  
 1094 of the results to the possibility of hidden confounding (unmeasured variables) through the use of sensitivity  
 1095 analysis.

1096 **e. Missing data**

1097 Missing data on individual measures will be pro-rated if more than 90% of the items are completed; otherwise  
 1098 the measure will be considered as missing.

1099 We will check for differential predictors of missing outcomes by comparing responders to nonresponders on  
 1100 key baseline variables. Any significant predictors will be included in the analysis models. This accounts for  
 1101 missing outcome data under a missing at random assumption, conditional on the covariates included in the  
 1102 model. As a sensitivity analysis, we will assess  
 1103 whether treatment adherence is associated with missing data, and if it is associated, use inverse  
 1104 probability weights or multiple imputation to compare results.

1105 **f. Presentation of results**

1106 Cohen's D effect sizes at 12 and 24 weeks will be calculated as the adjusted mean difference of the outcome  
 1107 divided by the sample standard deviation of the outcome at baseline. These will be displayed in a Forest Plot  
 1108 with the primary outcome at the top, all other paranoia outcomes below, followed by the mediators and the  
 1109 remaining secondary outcomes.

**1110 9. Database and data entry checks**

1111 Data quality will be ensured by close monitoring and routine auditing for accuracy throughout the data  
1112 collection period. In order to ensure the accuracy of the data entered into the database, the main outcome  
1113 measure entry will be checked for every participant by comparing the paper record with that on the database.  
1114 An error rate of no more than 5% is acceptable. This will be done once all possible assessments for each time  
1115 point have been completed. If the error rate is higher than 5%, advice will be sought from the trial statistician  
1116 and methodologist regarding further data  
1117 checking.

1118 **10. Draft figures and tables Figure 1:**  
 1119 Draft CONSORT statement  
 1120

Potential participants referred to SlowMo (n=XX)

ALLOCATION ENROLMENT

FOLLOW-UP

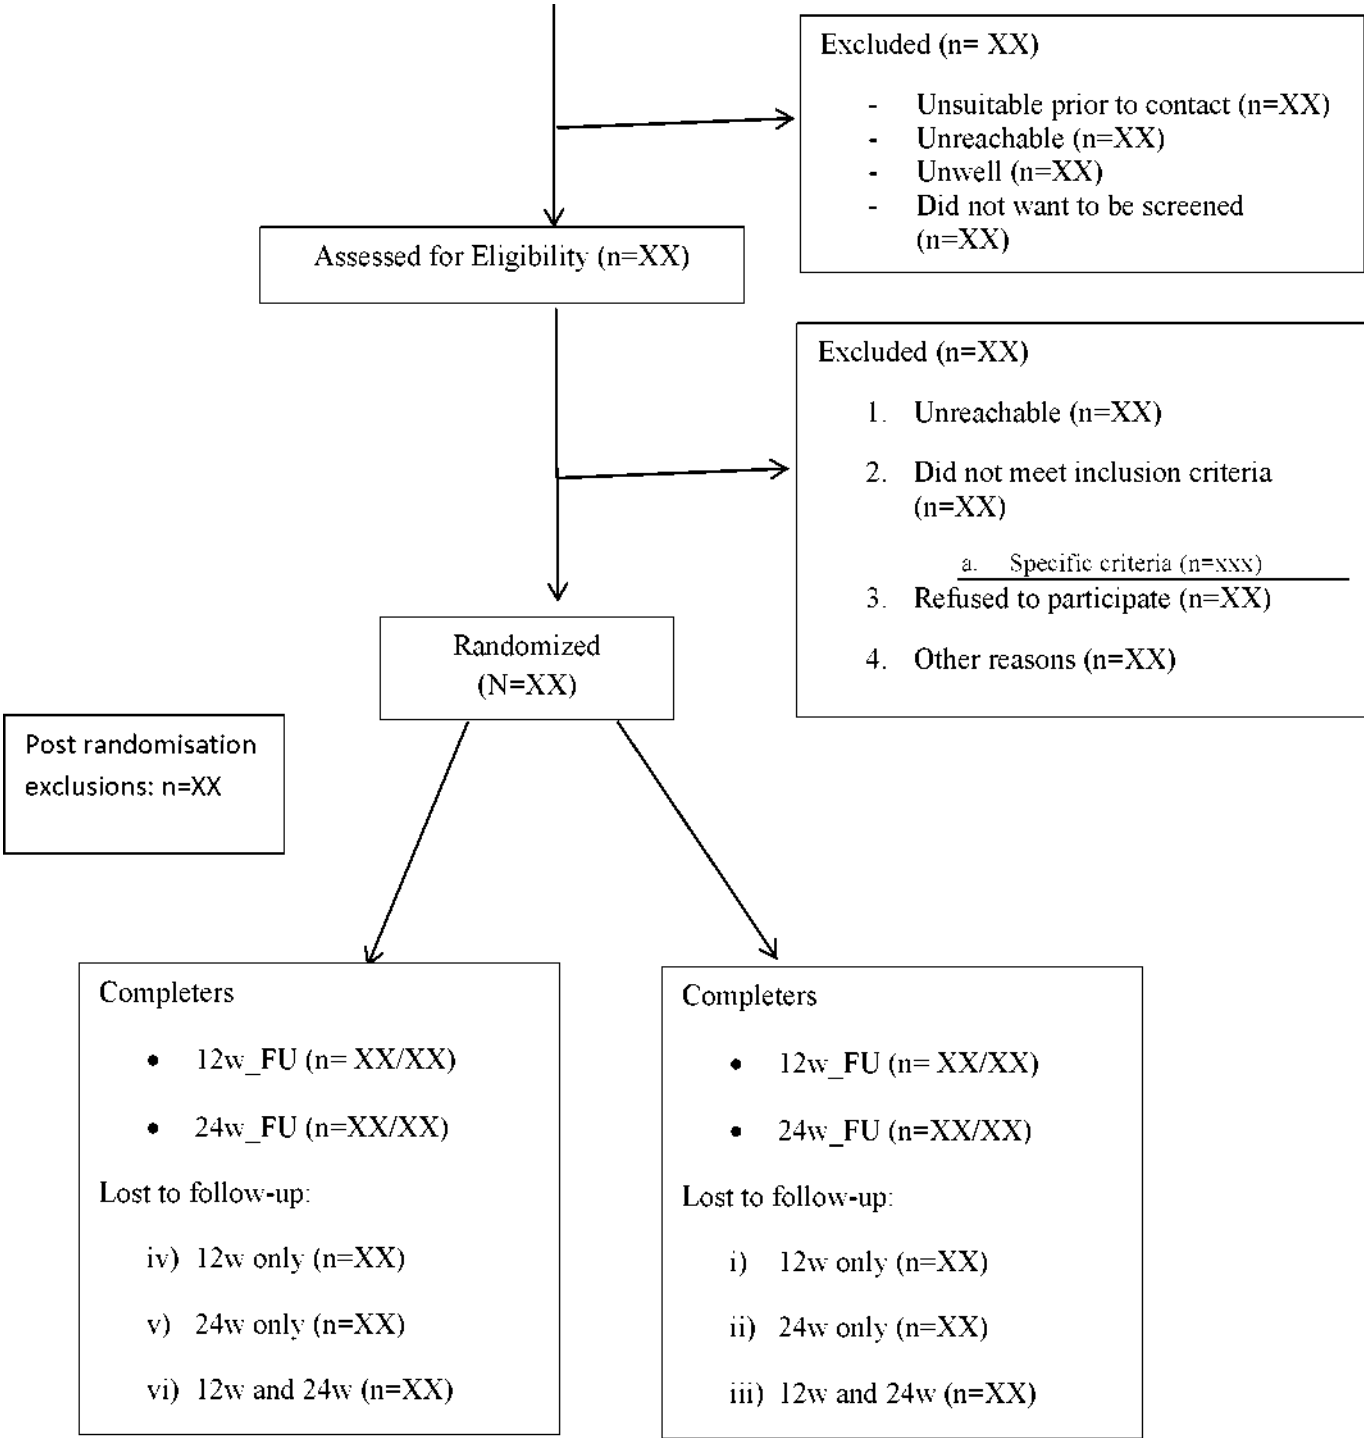

1122 Analysed (n=)

1123 Excluded from analysis

1124 (reasons) (n=)

1125

**Draft tables**

1126

**Table 1 - Descriptive characteristics at baseline.**

| Baseline characteristics        |                                               | Sample (N=) | SlowMo<br>n= | TAU<br>n= |
|---------------------------------|-----------------------------------------------|-------------|--------------|-----------|
| Scale                           |                                               |             |              |           |
| Sex N(%)                        | Male                                          |             |              |           |
|                                 | Female                                        |             |              |           |
| Ethnicity N(%)<br>N=            | White                                         |             |              |           |
|                                 | Black Caribbean                               |             |              |           |
|                                 | Black African                                 |             |              |           |
|                                 | Black Other                                   |             |              |           |
|                                 | Asian                                         |             |              |           |
|                                 | Other                                         |             |              |           |
| Marital status N(%)             | Single                                        |             |              |           |
|                                 | Cohabiting                                    |             |              |           |
|                                 | Married or civil partnership                  |             |              |           |
|                                 | Divorced                                      |             |              |           |
|                                 | Widowed                                       |             |              |           |
| Highest level of schooling N(%) | Primary school                                |             |              |           |
|                                 | Secondary no exams qualifications             |             |              |           |
|                                 | Secondary (O/ CSE equivalent)                 |             |              |           |
|                                 | Secondary (A level equivalent)                |             |              |           |
|                                 | Vocational Education/ college                 |             |              |           |
|                                 | University degree/ professional qualification |             |              |           |
|                                 | Missing or not applicable                     |             |              |           |
| Current working status N(%)     | Unemployed                                    |             |              |           |
|                                 | Employed full-time                            |             |              |           |
|                                 | Employed part-time                            |             |              |           |
|                                 | Self-employed                                 |             |              |           |
|                                 | Retired                                       |             |              |           |
|                                 | Student                                       |             |              |           |
|                                 | Housewife/husband                             |             |              |           |
| Normal living situation N(%)    | Living alone (+/- children)                   |             |              |           |
|                                 | Living with partner                           |             |              |           |
|                                 | Living with parents                           |             |              |           |
|                                 | Living with other relatives                   |             |              |           |
|                                 | Living with others                            |             |              |           |

1127

1128 Table 2: Baseline Characteristics - Stratification factors

| Baseline Characteristics |                  | Total | SlowMo | TAU |
|--------------------------|------------------|-------|--------|-----|
| Stratification Factor    |                  | N(%)  |        |     |
| Site                     | London           |       |        |     |
|                          | Oxford           |       |        |     |
|                          | Sussex           |       |        |     |
| Paranoia severity        | GPTS Part B < 62 |       |        |     |
|                          | GPTS Part B > 62 |       |        |     |

1129

1130 Table 3: Baseline clinical outcomes

| Scale                                             | Sample mean (SD) or N(%)                      | SlowMo | TAU |
|---------------------------------------------------|-----------------------------------------------|--------|-----|
| <b>Primary outcome</b>                            |                                               |        |     |
|                                                   | GPTS - total score                            |        |     |
|                                                   | GPTS (A) - ideas of social reference          |        |     |
|                                                   | GPTS (B) - paranoia                           |        |     |
| <b>Secondary outcomes - other paranoia scales</b> |                                               |        |     |
|                                                   | PSYRATS - Delusions                           |        |     |
|                                                   | SAPS - delusions item                         |        |     |
|                                                   | SAPS - ideas of reference item                |        |     |
|                                                   | R-GPTS total score                            |        |     |
|                                                   | R-GPTS (A)                                    |        |     |
|                                                   | R-GPTS (B)                                    |        |     |
| <b>Secondary outcomes - mediators</b>             |                                               |        |     |
|                                                   | Possibility of being mistaken (yes)           |        |     |
|                                                   | % conviction in Possibility of being mistaken |        |     |
|                                                   | Alternative explanations (yes)                |        |     |
|                                                   | Jumping to conclusions 85:15 task (yes)       |        |     |
|                                                   | Jumping to conclusions 85:15 task (Mean, SD)  |        |     |
|                                                   | Jumping to conclusions 60:40 task (yes)       |        |     |
|                                                   | Jumping to conclusions 60:40 task (Mean, SD)  |        |     |
| <b>Secondary outcomes - other problems</b>        |                                               |        |     |
|                                                   | Penn State Worry Questionnaire                |        |     |
|                                                   | Brief Core Schema Scales - negative self      |        |     |
|                                                   | Brief Core Schema Scales - positive self      |        |     |
|                                                   | Brief Core Schema Scales - negative other     |        |     |
|                                                   | Brief Core Schema Scales - positive other     |        |     |
|                                                   | FAST - fast thinking                          |        |     |
|                                                   | FAST - slow thinking                          |        |     |
|                                                   | WEMWBS                                        |        |     |

1131



1132

**Table 4: Primary outcome**

|          | Unadjusted, Mean (SD)  |                     |                                                |                            |
|----------|------------------------|---------------------|------------------------------------------------|----------------------------|
| Outcome  | SlowMo<br><i>n= XX</i> | TAU<br><i>n= XX</i> | Adjusted Difference (SE); p- value<br>(95% CI) | Cohen <i>d</i><br>(95% CI) |
| GPTS     |                        |                     |                                                |                            |
| 12 weeks |                        |                     |                                                |                            |
| 24 weeks |                        |                     |                                                |                            |
| GPTS -A  |                        |                     |                                                |                            |
| 12 weeks |                        |                     |                                                |                            |
| 24 weeks |                        |                     |                                                |                            |
| GPTS - B |                        |                     |                                                |                            |
| 12 weeks |                        |                     |                                                |                            |
| 24 weeks |                        |                     |                                                |                            |

1133 **Table 5: Secondary outcomes**

|          | Unadjusted, Mean (SD)  |                     |                                               |                            |
|----------|------------------------|---------------------|-----------------------------------------------|----------------------------|
| Outcome  | SlowMo<br><i>n= XX</i> | TAU<br><i>n= XX</i> | Adjusted Difference (SE); p-value<br>(95% CI) | Cohen <i>d</i><br>(95% CI) |
| Outcome  |                        |                     |                                               |                            |
| 12 weeks |                        |                     |                                               |                            |
| 24 weeks |                        |                     |                                               |                            |

1134

1135
